1 **Title: Single cell transcriptomics uncovers a non-autonomous *Tbx1*-dependent genetic program**  
2 **controlling cardiac neural crest cell deployment and progression**

3

4

5 **Authors:** Christopher De Bono<sup>1,\*</sup>, Yang Liu<sup>1</sup>, Alexander Ferrena<sup>1,2</sup>, Aneesa Valentine<sup>1</sup>, Deyou  
6 Zheng<sup>1,3,4</sup> and Bernice E. Morrow<sup>1,\*</sup>

7

8 **Addresses:**

9 <sup>1</sup> Department of Genetics, Albert Einstein College of Medicine, Bronx, NY, USA.

10 <sup>2</sup> Institute for Clinical and Translational Research, Albert Einstein College of Medicine, Bronx, NY,  
11 USA.

12 <sup>3</sup> Department of Neurology, Albert Einstein College of Medicine, Bronx, NY, USA.

13 <sup>4</sup> Department of Neuroscience, Albert Einstein College of Medicine, Bronx, NY, USA.

14

15 \* Corresponding authors

16 Bernice E. Morrow, Email: [bernice.morrow@einsteinmed.edu](mailto:bernice.morrow@einsteinmed.edu) and Christopher De Bono, Email:

17 [christopher.debono@einsteinmed.edu](mailto:christopher.debono@einsteinmed.edu)

18

19 **Key words:** Cardiac neural crest cells, Outflow tract, Pharyngeal arch arteries, *Tbx1*, Cell fate  
20 progression, Cell-cell communication, Congenital heart disease

21

22

23 **Abstract**

24 Disruption of cardiac neural crest cells (CNCCs) results in congenital heart disease, yet we do  
25 not understand the cell fate dynamics as these cells differentiate to vascular smooth muscle cells.

26 Here we utilized single-cell RNA-sequencing of NCCs from the pharyngeal apparatus with heart  
27 in control mouse embryos and when *Tbx1*, the gene for 22q11.2 deletion syndrome, is inactivated.  
28 We uncovered three dynamic transitions of pharyngeal NCCs expressing *Tbx2* and *Tbx3* through  
29 differentiated CNCCs expressing cardiac transcription factors with smooth muscle genes, and  
30 that these transitions are altered non-autonomously by loss of *Tbx1*. Further, inactivation of *Tbx2*  
31 and *Tbx3* in early CNCCs resulted in aortic arch branching defects due to failed smooth muscle  
32 differentiation. Loss of *Tbx1* interrupted mesoderm to CNCC cell-cell communication with  
33 upregulation of BMP signaling with reduced MAPK signaling and failed dynamic transitions of  
34 CNCCs leading to disruption of aortic arch artery formation and cardiac outflow tract septation.

35

36

## 37 **Introduction**

38 Neural crest cells (NCCs) are multipotent cells that migrate in three ordered streams from  
39 the rhombomeres in the neural tube to the pharyngeal apparatus where they differentiate to many  
40 cell types<sup>1</sup>. The pharyngeal apparatus is a dynamic embryonic structure consisting of individual  
41 pharyngeal arches (PA), forming in a rostral to caudal manner from mouse embryonic day (E) 8  
42 to E10.5. A subset of pharyngeal NCCs migrate through the caudal pharyngeal arches, PA3-6,  
43 and surround the pharyngeal arch arteries (PAAs), while others continue to migrate to the cardiac  
44 outflow tract (OFT), both differentiating to vascular smooth muscle cells<sup>2</sup>. Ablation of NCCs from  
45 PA3-6 results in interruption of the aortic arch and arterial branching defects as well as persistent  
46 truncus arteriosus of the OFT<sup>3</sup>. These NCCs in PA3-6, are referred to as cardiac NCCs (CNCCs)  
47 based upon their position and known function in heart development as well as their differentiation  
48 to vascular smooth muscle. Understanding CNCC development is critical to determine the  
49 pathogenesis of human congenital heart defects such as those observed in 22q11.2 deletion  
50 syndrome (22q11.2DS) patients<sup>4,5</sup>.

51 *TBX1*, encoding a T-box transcription factor, is the major gene for congenital heart disease  
52 in 22q11.2DS. Although 22q11.2DS is largely considered to be a neurocristopathy, *Tbx1* is not  
53 significantly expressed in CNCCs<sup>6</sup>, but it is strongly expressed in adjacent cells in the pharyngeal  
54 apparatus including the mesoderm. Global inactivation of *Tbx1* or conditional inactivation in the  
55 mesoderm using *Mesp1*<sup>Cre</sup><sup>7</sup> in the mouse results in neonatal lethality with a persistent truncus  
56 arteriosus<sup>8-10</sup>, in part due to failed CNCC development<sup>6</sup>. Therefore, one of the main functions of  
57 *Tbx1* in the pharyngeal mesoderm is to signal to CNCCs to promote their development. In order  
58 to understand how CNCCs are affected non-autonomously in *Tbx1* mutant embryos, it is essential  
59 to define their transcriptional signatures and cardiac fate acquisition in the normal situation  
60 between E8.5 and E10.5, when *Tbx1* is expressed in the pharyngeal apparatus and when  
61 inactivated, on a single cell level.

62 Previously, single cell RNA-sequencing (scRNA-seq) of NCCs from early stages in the  
63 chick embryo identified expression of *Tgif1*, *Est1* and *Sox8* being important for early CNCC  
64 identity and fate decisions<sup>11</sup>. However, these were early migrating mesenchymal NCCs that also  
65 have the potential to contribute to the craniofacial skeleton and other cell types. Another seminal  
66 scRNA-seq study demonstrated that NCC fate choices are made by a series of sequential binary  
67 decisions in mouse embryos at E8.5-10.5<sup>12</sup> but did not focus on detailed steps of cardiac fate  
68 acquisition or investigate *Tbx1* function<sup>12</sup>.

69 To uncover genetic signatures and dynamic transitions of CNCCs in the normal situation  
70 and when *Tbx1* is inactivated, we performed scRNA-seq of NCCs from control and *Tbx1* null  
71 mutant mouse embryos. We found that smooth muscle cell fate acquisition is in part dependent  
72 on two other T-box genes, *Tbx2* and *Tbx3*. When *Tbx1* is inactivated, we found failure of dynamic  
73 progression of CNCC maturation due to disruption of cell-cell communication from mesodermal  
74 cells, resulting in down regulation of MAPK signaling and upregulation of the BMP pathway, as  
75 well as affecting other, known and novel, ligand receptor interactions.

76

## 77 **Results**

78 **Single cell transcriptional profiling of NCCs in the pharyngeal apparatus.** We performed  
79 scRNA-seq of the *Wnt1-Cre*, *ROSA-EGFP* genetic lineage<sup>13,14</sup> in the mouse pharyngeal  
80 apparatus at E8.5, E9.5 and E10.5 (Fig. 1A-F). These stages correspond to developmental time  
81 points when *Tbx1* is highly expressed in cell types adjacent to NCCs. At E8.5, the anterior half of  
82 the embryo was dissected (Fig. 1A), while at E9.5 the pharyngeal apparatus with heart was  
83 microdissected (Fig. 1B). At E10.5 arches two to six and the heart were included in the dissection  
84 (Fig. 1C). EGFP positive NCCs were purified by FACS and the Chromium 10X platform was used  
85 to perform scRNA-seq and data from 36,721 NCCs were obtained (Supplementary Table 1).  
86 Unsupervised clustering was performed using Seurat software<sup>15</sup> and individual clusters were  
87 identified (Fig. 1D-F).

88 Expression of *Sox10* and *Twist1* were used to identify early migratory and mesenchymal  
89 NCCs, respectively<sup>16</sup>. We used *Hox* and *Dlx* (Homeodomain) genes to provide spatial context to  
90 different arches (PA2-6; <sup>17</sup>). At E8.5, *Sox10* and *Twist1* show overlap in expression, while at E9.5,  
91 expression became complementary, with a relative reduction of *Sox10*+ NCCs and increased  
92 *Twist1*+ NCCs in the expanded populations of mesenchymal NCCs (Fig. 1G-I). At E8.5 and E9.5,  
93 *Hoxa2* was expressed in PA2 and PA3-6, while *Hoxb3* was expressed only in PA3-6 containing  
94 NCCs that will invade the OFT and surround the PAAs (Fig. 1D,E,G,H). Using the *Hox* genes as  
95 a guide, at E9.5, early migrating *Sox10*+ NCCs of PA2 and PA3 were clustered together (cluster  
96 C4), suggesting that they have a similar transcriptional profile. At E10.5, the relative proportion of  
97 *Twist1* expressing mesenchymal cells increased with respect to reduction of *Sox10* expressing  
98 cells (Fig. 1F, 1I). Further, at E10.5, *Hoxa2* expression was expanded within the mesenchymal  
99 cell populations, and *Hoxb3* was expressed in NCCs of PA3-6 (cluster C3 at E9.5 is similar to C2  
100 at E10.5; Fig. 1F, 1I). Additional marker genes are shown in Supplementary Data 1 (E8.5), 2  
101 (E9.5) and 3 (E10.5). Spatial localization was confirmed for *Sox10*, *Hoxa2* and *Hoxb3* expression  
102 by wholemount RNAscope *in situ* hybridization (Fig. 1J-L). In addition, to anterior-posterior spatial



103 localization of the cells, we identified their proximal-distal location in the PAs with *Dlx2*, *Dlx5* and  
104 *Dlx6* (Supplementary. Fig 1).

105

106 **Identification of cardiac NCC gene signatures.** Differentiated NCCs of the OFT and PAAs  
107 express smooth muscle genes such as smooth muscle actin, *Acta2*<sup>18,19</sup>. *Acta2* is a representative  
108 marker gene of smooth muscle cells that include expression of *Tagln*, *Myh9*, *Myh9*, and *Cnn1*. We  
109 identified a cluster of cells expressing *Acta2* at E9.5 and 10.5 (cluster C14, Fig. 2A; C10, Fig.3A),  
110 but not at E8.5. To delineate molecular signatures of cardiac NCCs (CNCCs), we evaluated genes  
111 that are co-expressed with *Acta2* and identified known genes for cardiac development including  
112 *Tbx2*, *Tbx3*, *Msx2*, *Isl1*, *Gata3* and *Hand2*, at E9.5 and E10.5 (Fig. 2A; Fig. 3A). These genes are  
113 not only expressed in *Acta2*<sup>+</sup> cells but also in NCCs in the distal PA1-3 expressing *Dlx5* at E9.5  
114 (C1, C3; Fig. 2A) and in PA2-6 at E10.5 (C2, C3, C4; Fig. 3A). At E9.5, we validated co-expression  
115 of ISL1 in CNCCs in the OFT of which some expressed ACTA2 (Fig. 2B). Further, RNAscope *in*  
116 *situ* analysis confirmed the expression of *Gata3*, *Isl1* and *Msx2* in CNCCs within the OFT at E9.5  
117 (Fig. 2C-E). At E10.5, *Isl1* and *Gata3* were expressed in CNCCs within the cardiac cushions of  
118 the distal OFT and in the mesenchyme of the dorsal aortic sac wall and aortic sac protrusion (Fig.  
119 3B). *Gata3* was expressed in a larger domain of the OFT than *Isl1*. When taken together, we now  
120 identify the genetic signatures of CNCCs of the forming OFT.

121 *Tbx2* and *Tbx3* were widely expressed in pharyngeal NCCs at E9.5 (Fig. 2A), but their  
122 expression was restricted to cell clusters comprising PA3-6 at E10.5 (Fig. 3A). *Tbx2* and *Tbx3*  
123 were expressed immediately lateral and dorsal to *Isl1* and *Gata3* expressing CNCCs in embryos  
124 at E10.5 by RNAscope analysis (Fig. 3C-E). In addition, *Tbx2* and *Tbx3*, but not *Isl1* and *Gata3*,  
125 were expressed in NCCs surrounding the PAAs that are differentiating to smooth muscle at E10.5  
126 (Fig. 3D,E,G). Both ISL1 and TBX2 proteins were expressed in smooth muscle cells of the OFT  
127 and PAAs, respectively (ACTA2 or TAGLN; Fig. 3F,G). Expression of *Tbx2*, *Tbx3*, *Isl1*, *Gata3* and  
128 *Acta2* in NCCs at E10.5 is illustrated in Fig. 3H. A subset of pharyngeal NCCs will form the

129 CNCCs, defined as NCCs expressing markers specific to the cardiac or smooth muscle lineages.  
130 We refer to the CNCCs in the pharyngeal arches as P-CNCCs (Fig. 3H). Therefore, CNCCs can  
131 be subdivided into four populations based upon position and expression of cardiac or smooth  
132 muscle genes, referred to as P-CNCCs, PAA-CNCCs of PAAs expressing *Acta2*, OFT-CNCCs of  
133 the OFT expressing *Isl1* and *Gata3* and SM-CNCCs of the OFT that express *Acta2* (Fig. 3H).

134 We noted earlier that some CNCCs were located in clusters from PA1 and PA2 (C1; Fig.  
135 2A), that are not typically considered to harbor CNCCs. Consistent with this, at E9.5 (20 somites)  
136 we found that the OFT was connected to PA2 and CNCCs from PA2 are entering the OFT (Fig.  
137 2F). At late E9.5 (24 somites), the OFT was located between PA2 and PA3 and the first CNCCs  
138 from PA3 were entering the OFT (Fig. 2G). These data are consistent with evidence from a  
139 previous report<sup>20</sup>, that NCCs from anterior arches also contribute to the developing heart.

140

141 **Cardiac NCC fate dynamics that drive differentiation to smooth muscle cells.** To uncover  
142 CNCC cell fate dynamics at E9.5, we used CellRank software<sup>21</sup> (Fig. 2H, I). We discovered genes  
143 that were progressively activated during the transition from pharyngeal NCCs to SM-CNCCs,  
144 which are candidate cardiac lineage driver genes (Fig. 2J, K; Supplementary data 4 for the full list  
145 of genes). Our analysis indicates that CNCCs progressively activate *Tbx2*, *Tbx3*, *Msx2*, *Hand2*,  
146 *Gata3* and *Isl1* expression during their commitment towards *Acta2*<sup>+</sup> smooth muscle cells at E9.5  
147 (Fig. 2J,K).

148 To understand how CNCCs progress at E10.5, when there are more smooth muscle cells  
149 in the pharyngeal arches, we used CellRank software and generated PAGA (partition-based  
150 graph abstract) plots (Fig. 3I-K). The cell fate probability map from CellRank identified cells with  
151 a high potential to differentiate to smooth muscle fates (from cluster C2 and C3 to C10; Fig. 3J).  
152 The PAGA plots further indicated that some pharyngeal NCCs (cluster C2) are P-CNCCs and  
153 they transition to OFT-CNCCs (cluster C3) that then transition to SM-CNCCs (cluster C10; blue  
154 color fraction in pie chart; Fig. 3K). This data also indicates that a small fraction of P-CNCCs may

155 directly differentiate to smooth muscle cells (blue fraction in the pie chart in C2), in agreement  
156 with *Tbx2* and *Tbx3* expression in PAA-CNCCs at E10.5 (Fig. 3D, E, G). We identified genes  
157 whose expression correlates with SM-CNCC fate acquisition (Fig. 3L, M; Supplementary data 5  
158 for full list of genes at E10.5). Representative genes were ordered according to their expression  
159 peak in pseudotime and included *Tbx2*, *Tbx3*, *Foxf1*, *Isl2*, *Msx2*, *Isl1*, *Hand1*, *Hand2*, *Mef2c*,  
160 *Rgs5*, *Gata3*, *Acta2*, *Gata4* and *Gata6*.

161 We generated lineage driver gene sets by dividing the genes in the fate probabilities heat  
162 map from *Bmp4* to *Gata6*, least to most differentiated to SM-CNCCs, to four groups of equal size  
163 (Fig. 3L; Supplementary data 5). Next, we performed Gene Ontology (GO) enrichment analysis  
164 using ToppGene Suite<sup>22</sup> to understand the function of the genes in each group (Fig. 3N;  
165 Supplementary data 6). Our analysis indicates that the initially activated genes of pharyngeal  
166 NCCs that include some P-CNCCs, are associated with general pharyngeal arch development  
167 processes (e.g. *Hox*, *Dlx*, *Six2* genes). Then cell division (cell cycle) genes are highly expressed,  
168 consistent with the expansion of pharyngeal NCCs during development<sup>23</sup>, together with cardiac  
169 development genes. Finally, genes important in cardiac development, cell adhesion and actin-  
170 filament processes (*Hand1*, *Gata3/4/5/6*, *Isl1*, *Acta2*) become strongly expressed (Fig. 3N). In  
171 addition, our functional enrichment analysis identified genes associated with congenital heart  
172 disease such as tetralogy of Fallot, double outlet right ventricle and ventricular septal defects  
173 (Supplementary data 6), which supports the importance of the genetic program of CNCCs in OFT  
174 formation and disease.

175 Thus, here we identified a specific CNCC transcriptomic signature at E9.5-10.5 and  
176 revealed that cell fate acquisition to smooth muscle cells requires a multistep specification  
177 process. We additionally identified new genes such as *Dkk1*, *Gata3*, *Foxf1*, *Isl2*, *Tbx2*, *Tbx3*,  
178 *Rgs5*, among others, which have not yet been considered as CNCC markers (Supplementary  
179 data 4 and 5).

180

181 ***Tbx2* and *Tbx3* are required in cardiac NCCs for aortic arch branching.** *Tbx2* and *Tbx3* are  
182 expressed in multiple tissue types within the pharyngeal apparatus and global inactivation of both  
183 genes leads to early embryonic lethality with severe cardiac defects<sup>24-27</sup>. To understand the  
184 requirement of *Tbx2* and *Tbx3* in NCCs, we generated *Wnt1-Cre/+;Tbx2<sup>ff</sup>;Tbx3<sup>ff</sup>* double  
185 conditional mutant embryos (*Tbx2/3* cKO). We performed intracardiac ink injection and  
186 histological analysis at E15.5 (Fig. 4A-I) and found that 38.5% of *Tbx2/3* cKO embryos had an  
187 aberrant retro-esophageal right subclavian artery (ARSA) but no intracardiac defects (Fig 4A-I  
188 and M). No defects were identified in *Wnt1-Cre/+;Tbx2<sup>ff</sup>;Tbx3<sup>fl/+</sup>* nor in *Wnt1-Cre/+;Tbx2<sup>fl/+</sup>;Tbx3<sup>ff</sup>*  
189 embryos. The right subclavian artery is formed from the right 4<sup>th</sup> PAA. By immunostaining on  
190 coronal sections of *Wnt1-Cre/+;Tbx2<sup>ff</sup>;Tbx3<sup>ff</sup>;ROSA-EGFP<sup>fl/+</sup>* embryos at E11.5 using GFP and  
191 ACTA2 antibodies, we found that NCCs contributed to the right 4<sup>th</sup> PAAs but failed to differentiate  
192 into smooth muscle cells (Fig. 4J-L). *Bmp4* and *Foxf1* have been identified as regulators of smooth  
193 muscle cell differentiation in other organs<sup>28</sup>. We found that *Bmp4* and *Foxf1* expression is  
194 activated temporally after *Tbx2* and *Tbx3* expression during cardiac fate acquisition (Fig. 3L).

195

196 **Disruption of cardiac NCCs by loss of *Tbx1*.** In *Tbx1* null mutant embryos, the caudal  
197 pharyngeal apparatus is hypoplastic and unsegmented at E9.5 and E10.5 due in part to failed  
198 deployment of NCCs<sup>6</sup> (Fig. 5A, Fig 7A). Further, CNCCs fail to enter the shortened cardiac OFT,  
199 leading to a persistent truncus arteriosus later in development<sup>6</sup>. We found that *Tbx1* was not  
200 noticeably expressed in NCCs (Supplementary Fig. 2) and its conditional deletion in NCCs using  
201 *Wnt1-Cre* did not lead to cardiac defects (Supplementary Fig. 3).

202 To understand how the absence of *Tbx1* affects development of CNCCs, we performed  
203 scRNA-seq of NCCs isolated from the microdissected pharyngeal region plus heart of *Tbx1* null  
204 mutant embryos at E9.5. We obtained sequencing data from 11,301 NCCs (Fig 5A;  
205 Supplementary Table 1) and integrated scRNA-seq data from control and *Tbx1* null embryos  
206 using RISC (Robust Integration of scRNA-seq) software<sup>29</sup>. Even though there were visibly fewer

207 NCCs in the pharyngeal apparatus (Fig. 5A), there were no missing cell clusters in *Tbx1* null  
208 embryos (Fig. 5B-C). We then compared the proportion of cells in each cluster among the total  
209 number of NCCs in each dataset. As expected, there was a reduction in the relative proportion of  
210 NCCs from *Tbx1* null embryos as compared to controls, as shown in Fig. 5D, in PA3 (C4, 1.5 fold),  
211 in proximal PA2 (C8, 1.4 fold), in cluster C9 corresponding early migrating NCCs in PA2 and PA3  
212 (1.2 fold), and in C5 corresponding to early migrating NCCs in PA1 (1.4 fold). In addition, there  
213 was an increase of the relative proportion of NCCs in cluster C3 (1.6 fold) that corresponds to the  
214 distal part of PA1 and PA2 (Fig. 5D) and it is known that cells from PA2 abnormally migrate to  
215 PA1 in *Tbx1* null embryos<sup>6</sup>.

216

217 **Altered BMP and MAPK signaling pathways in the absence of *Tbx1*.** We examined the data  
218 to identify differentially expressed genes (DEGs) in mutant versus control embryos at E9.5.  
219 Surprisingly, we found few DEGs per cluster at this stage (Supplementary data 7). However, in  
220 *Tbx1* null embryos there was a clear increase in the expression of genes that act downstream of  
221 BMP signaling in proximal PA2 and PA3 (clusters C4, C8; Fig. 5E). This includes increased  
222 expression of *Msx2*, *Bambi*, *Gata3*, *Dkk1*, *Smad6*, *Id2* and *Id3*. Our analysis also revealed a  
223 downregulation of the expression of genes in the MAP kinase (mitogen-activated protein kinase)  
224 signaling pathway including *Spry2*, *Spry4*, *Myc*, *Foxo1*, *Lyn*, and *Dusp3* (Fig 5E). Signaling by  
225 BMP<sup>30</sup> and growth factors activating the MAPK pathway<sup>31</sup> are two signaling pathways known to  
226 be critical for NCC development and migration during embryogenesis. Gene enrichment analysis  
227 of DEGs by cluster profiler R software<sup>32</sup> confirmed an increase in expression of genes in the BMP  
228 signaling pathway (Fig. 5F, Supplementary data 8) and a decrease in expression of genes related  
229 to negative regulation of MAPK cascade and activity (Fig. 5G, Supplementary data 9). There was  
230 an increase in expression of *Msx2* and *Gata3* (downstream in the BMP pathway) as well as  
231 reduced expression of *Spry4* (MAPK pathway) in scRNA-seq data of *Tbx1* null embryos (Fig. 5H).  
232 Expression of BMP downstream genes, *Msx2* and *Bambi*, were expanded dorsally in *Tbx1* null

233 mutant embryos by wholemount RNAscope *in situ* and 3D reconstruction (Fig. 5I). These results  
234 were confirmed by RNAscope assays on traverse sections of control and *Tbx1* null embryos (Fig.  
235 5J). In addition, there was an increase and ectopic expression of P-SMAD1/5/9, marking an  
236 increase in BMP signaling, in NCCs towards the dorsal part of the pharyngeal apparatus in *Tbx1*  
237 null embryos (PA2, PA3; Fig. 5K). These data suggest that altered BMP and MAPK signaling  
238 might affect NCC development in *Tbx1* null embryos. A schematic representation of expanded  
239 BMP signaling and reduced NCCs migrating to the shortened OFT in *Tbx1* null embryos at E9.5  
240 is shown in Fig. 5L.

241

#### 242 **Cell-cell communication from the mesoderm to NCCs is disrupted in the absence of *Tbx1*.**

243 During formation of the heart, NCCs receive critical signaling from adjacent mesodermal cells  
244 (Fig. 6A). We investigated cell-cell communication and how it is disrupted in the absence of *Tbx1*  
245 at single cell resolution using CellChat software<sup>33</sup>.

246 Inactivation of *Tbx1* in the mesoderm results in similar pharyngeal hypoplasia and altered  
247 NCC distribution as in global null embryos, implicating the pharyngeal mesoderm as being critical  
248 to signal to NCCs<sup>34</sup>. To identify *Tbx1*-dependent signals from the mesoderm to NCCs, we  
249 investigated existing scRNA-seq data from *Mesp1<sup>Cre</sup>* control and *Tbx1* conditional null embryos  
250 at E9.5<sup>35</sup>. We focused on mesodermal subpopulations, expressing *Tbx1*, that are adjacent to the  
251 NCCs including the anterior and posterior second heart field (aSHF; pSHF)<sup>36,37</sup>. We also included  
252 a critical *Tbx1*-dependent multilineage progenitor population (MLP) in the pharyngeal mesoderm  
253 required for cell fate progression to the aSHF and pSHF<sup>35</sup>. We examined signaling to NCCs in  
254 clusters corresponding to migrating NCCs of the future PA2-6 (C9), distal part of PA1-2 (C3),  
255 mesenchyme of PA2 (C8) and PA3-6 (C4), and CNCCs of the OFT (C12) in integrated scRNA-  
256 seq data from control and *Tbx1* null embryos at E9.5 (Fig. 5; Fig. 6B). Representative results of  
257 ligand-receptor pairs altered when *Tbx1* is inactivated are shown in Fig. 6B, and the complete set  
258 of pairs are in Supplementary Fig. 4.

259 Affected ligands in the mesoderm include *Wnt5a*, *Wnt2*, *Sema3c*, *Pdgfa*, *Nrg1*, *Fgf8*,  
260 *Fgf10*, *Bmp4* and *Edn3* and others. To validate relationships, we analyzed integrated *Mesp1<sup>Cre</sup>*  
261 data (Fig. 6C; MLPs-C8, aSHF-C10 and pSHF-C1+C12). *Isl1*, is a critical gene required for OFT  
262 development<sup>38</sup>, and it is expressed in the MLPs, aSHF and pSHF (Fig. 6D). We examined  
263 expression changes of *Wnt5a*, *Wnt2*, *Sema3c*, *Pdgfa*, *Nrg1*, *Fgf10* and *Edn3* (Fig. 6E-K). These  
264 genes were altered in expression in the cell types specified and, in the direction of altered  
265 signaling (decreased or increased in the mutant embryos), as indicated in Fig. 6B.

266 Reduced expression of *Wnt5a*<sup>39,40</sup>, *Fgf8*<sup>35,41,42</sup>, *Fgf10*<sup>43,44</sup>, *Sema3c*<sup>45</sup> and *Nrg1*<sup>35</sup> ligands  
267 and increase of *Wnt2*<sup>46</sup> are consistent with previous *in vivo* studies of *Tbx1* mutant embryos,  
268 however these were not known with respect to cell-cell communication to NCCs. With this data,  
269 we show on a single cell level, that this signaling to NCCs is altered in *Tbx1* mutant embryos. Two  
270 additional ligand genes, *Edn3* and *Pdgfa* were not investigated regarding *Tbx1* (Fig. 6H, 6K).  
271 *Edn3* encodes an endothelin ligand important in cell migration but not well known with respect to  
272 *Tbx1*. *Pdgfa* encodes a growth factor regulating cell survival, proliferation and migration and  
273 PDGF signaling is required in NCC development<sup>47</sup>.

274 We investigated CellChat results for the BMP and MAPK pathways that were altered in  
275 NCCs when *Tbx1* was inactivated. An abnormal increase of the BMP signaling from the  
276 mesoderm to NCCs in *Tbx1* mutant embryos was found through *Bmp4/5/7* ligands (Fig. 6B). *Fgf8*  
277 and *Fgf10* are ligands in FGF signaling that act through the MAPK pathway and it is well known  
278 that they are reduced in expression in *Tbx1* mutant embryos<sup>35,41-44</sup> (Fig. 6J). Similarly, we found  
279 that *Fgf8* and *Fgf10* were reduced in expression in the mesoderm and signaling to NCCs was  
280 altered (Fig. 6B and Supplementary Fig. 4). It is known that FGF and BMP pathways can act  
281 antagonistically<sup>48,49</sup>. Therefore, it is possible that reduction of FGF and changes in other ligands  
282 in the adjacent mesoderm, could result in ectopic BMP and reduced MAPK signaling in NCCs  
283 leading to their failed progression.

284



285 **Failed cardiac cell fate progression of NCCs in the absence of *Tbx1* at E10.5.** To further  
286 understand how contribution of NCCs to the OFT is altered in the absence of *Tbx1*, we performed  
287 scRNA-seq of NCCs in *Tbx1* null embryos at E10.5, when the caudal pharyngeal apparatus is  
288 extremely hypoplastic (Fig. 7A). We integrated scRNA-seq data from two control replicates  
289 (21,561 cells) and two *Tbx1* null replicates (17,840 cells) using RISC software (Fig. 7B). The  
290 integrated datasets clearly show a strong reduction in the number of NCCs in most clusters in  
291 *Tbx1* null embryos including OFT-CNCCs (*Isl1/Gata3*<sup>+</sup>; C10) and SM-CNCCs (*Acta2*<sup>+</sup>; C13) as  
292 shown in Fig. 7C, except that the relative proportion of pharyngeal NCCs that contain P-CNCCs  
293 (*Tbx2/Tbx3*<sup>+</sup>; C4) is not changed, after considering the total cells being sequenced (Fig. 7D). Our  
294 analysis showed that the cell fate probabilities point from pharyngeal NCCs containing P-CNCCs  
295 (C4) and OFT-CNCCs (C10) toward SM-CNCCs (C13) as shown in Fig. 7E. We generated a list  
296 of DEGs in clusters C4 and C10, between control and mutant embryos at E10.5 (Supplementary  
297 data 10). Consistent with data from E9.5, *Msx2*, *Bambi*, *Gata3* and *Dkk1* were increased and  
298 ectopically expressed in pharyngeal NCCs in *Tbx1* null embryos (Fig. 7F, Supplementary data  
299 10), suggesting an abnormal upregulation of BMP signaling in the absence of *Tbx1*, consist with  
300 data in Figure 6. By GO analysis, we found downregulation in expression of genes involved in  
301 embryonic organ development and mesenchyme development in pharyngeal NCCs that contain  
302 P-CNCCs (Fig. 7G; Supplementary data 11), suggesting dysregulation of NCC development.  
303 Interestingly, there was an upregulation of genes that inhibit cell cycle progression of OFT-CNCCs  
304 (Fig. 7H; Supplementary data 12). By immunostaining, we confirmed the overall reduction in the  
305 number of CNCCs within the OFT and NCCs in the pharyngeal region of *Tbx1* null embryos (Fig.  
306 7I,J). We also confirmed a reduced number of ISL1<sup>+</sup> NCCs in dorsal aortic sac wall mesenchyme  
307 and distal OFT and absence of the aortic sac protrusion in *Tbx1* null embryos (Fig. 7I). Supporting  
308 the scRNA-seq data, immunostaining experiments indicated that TBX2 (and likely TBX3)  
309 expression is maintained in NCCs located in the lateral part of the pharyngeal apparatus. We also  
310 noticed normal differentiation of the CNCCs within the OFT of *Tbx1* null embryos despite that



311 there are fewer cells (Fig. 7J). Together this suggests a failure of cardiac fate progression between  
312 pharyngeal NCCs and OFT-CNCCs states in the absence of *Tbx1*.

313

## 314 **Discussion**

315 In this report, we identified the signatures and cell fate dynamics of CNCCs. We focused  
316 on pharyngeal NCCs in the mouse at developmental stages when *Tbx1*, the gene for 22q11.2DS  
317 is highly expressed and functions. We determined the mechanisms by which *Tbx1* non-  
318 autonomously regulates CNCC maturation at a single cell level and found altered BMP and MAPK  
319 signaling may contribute to cardiovascular malformations when *Tbx1* is inactivated. We also  
320 uncovered novel genes and ligand-receptor pairs with respect to cell-cell communication from  
321 mesoderm to NCCs that are new to our understanding of CNCC fate progression.

322 NCCs are multipotent and differentiate to many cell types including smooth muscle cells.  
323 Through examination of transitional dynamics along with embryonic localization by *in situ*  
324 analysis, we uncovered three main transition states from pharyngeal to smooth muscle  
325 expressing CNCC derivatives, termed P-CNCCs, OFT-CNCCs and SM-CNCCs as shown in the  
326 model in Fig. 8A. The P-CNCCs express *Hox* and *Dlx* genes, as well as those implicated in cardiac  
327 development including *Tbx2*, *Tbx3*, *Six2*, *Shox2*, *Bmp4*, *Prdm1*, *Daam2*, *Scube1*, *Angptl1*, *Tfap2b*  
328 and *Mef2c*. Our data also suggests that some *Tbx2/3+* cells differentiate directly into *Acta2+*  
329 smooth muscle in the PAAs (PAA-CNCCs; Fig. 8A). A role of *Tbx2* and *Tbx3* in CNCCs in PAA  
330 development have not been previously described and we found that inactivation results in  
331 abnormal arterial branching at reduced penetrance, indicating besides function as markers of P-  
332 CNCCs, they have a role in smooth muscle differentiation. The second state of OFT-CNCCs  
333 express cardiac transcription factors such as *Hand1/2*, *Msx1/2*, *Mef2c* and *Gata3* as well as *Isl1*  
334 and *Isl2* (Fig. 8A). These cells are required for OFT development, as determined by conditional  
335 inactivation studies in NCCs of *Hand2*<sup>50</sup>, *Msx1* and *Msx2*<sup>51</sup>. Expression of *Isl1* in CNCCs  
336 contributing to the OFT is consistent with a dual lineage tracing study<sup>52</sup>. We also identified genes

337 not previously connected to CNCCs that include *Dkk1*, *Foxf1*, *Rgs5*, *Isl2* and *Gata3*. Finally, the  
338 third state is SM-CNCCs within the OFT that express *Acta2* smooth muscle genes together with  
339 *Gata4*, *Gata5* and *Gata6*. Supporting their requirement, conditional deletion of *Gata6* in NCCs  
340 results in septation defects of the OFT<sup>53</sup>. We additionally found novel genes not yet connected to  
341 these cells, including *Meox1*, *Bambi*, *Smad6* and *Smad7*. We found that progression of CNCC  
342 fate toward smooth muscle of the OFT is associated with progressive downregulation of genes  
343 involved in pharyngeal embryonic development and progressive increase in cardiac specification  
344 genes, consistent with maturation of the unipotent cellular state to smooth muscle cells (Fig. 8A).

345 Development of NCCs in the pharyngeal apparatus is regulated by cell-cell signaling, in  
346 particular from the pharyngeal mesoderm as uncovered by studies of *Tbx1* mutant embryos<sup>34,54</sup>.  
347 In global null or *Mesp1*<sup>Cre</sup> mediated *Tbx1* conditional null embryos, there is altered deployment of  
348 CNCCs and reduced contribution to the OFT leading to a persistent truncus arteriosus<sup>34,54</sup>. Our  
349 results suggest that NCCs are produced normally in the neural tube in the absence of *Tbx1*, but  
350 they fail to migrate to the caudal pharyngeal arches and OFT and we suggest this is due to  
351 disrupted signaling from adjacent mesodermal cells to the NCCs. Here, we identified several  
352 receptor-ligand interactions that are disrupted by comparing scRNA-seq data from NCCs and the  
353 *Mesp1*<sup>Cre</sup> lineages.

354 Using CellChat software<sup>33</sup>, we confirmed known interactions and their disruption in *Tbx1*  
355 mutant embryos, now for the first time to NCCs at a single cell level. For example, we identified a  
356 reduction of FGF signaling from mesodermal cells to NCCs. Reduced expression of *Fgf* ligands  
357 including *Fgf8* and *Fgf10* in the mesoderm of *Tbx1* null embryos have been reported  
358 previously<sup>44,55</sup>. FGF and BMP signaling, both important for NCCs development, can act in an  
359 antagonistic manner<sup>48</sup>. In addition, FGF signaling activates the MAPK signaling pathway that is  
360 critical for NCC development and migration<sup>31</sup>. Here we propose a model in which FGF paracrine  
361 signaling from the mesoderm is required to restrict BMP signaling and activate MAPK signaling  
362 in pharyngeal CNCCs necessary for their development and progression to the heart (Fig. 8B). In

363 the absence of *Tbx1*, FGF signaling from the mesoderm is reduced leading to ectopic and  
364 overactivation of the BMP pathway and abnormal down-regulation of MAPK pathway in adjacent  
365 pharyngeal CNCCs that fail to develop correctly (Fig. 8B). This is consistent with our *in vivo*  
366 observation that BMP signaling is abnormally expanded in NCCs in the pharyngeal region of *Tbx1*  
367 null mutant embryos and with our *in silico* study showing reduction of downstream effector genes  
368 in the MAPK pathway. Reduced phospho-ERK1/2 has previously been reported in NCCs of *Tbx1*  
369 null mutant embryos<sup>56</sup>. Our investigation also indicates that BMP4-Bmpr1a+Bmpr2 signaling from  
370 mesoderm progenitor populations to NCCs in PA2-6 is abnormally upregulated in *Tbx1* mutant  
371 embryos. BMP4 can activate BMP signaling through p-SMAD1/5/9<sup>57,58</sup> and our analysis indicates  
372 no change in expression of *Bmpr1a* and *Bmpr2* genes in NCCs of *Tbx1* null embryos at E9.5,  
373 raising the possibility of a direct upregulation of BMP signaling in CNCCs by mesoderm cells.

374 Interestingly, our analysis also reveals that Neuregulin (*Nrg1*)-ERBB3 signaling from the  
375 MLP to the pharyngeal NCCs of PA2 to PA6 at E9.5 is downregulated in *Tbx1* mutant embryos.  
376 Neuregulin is important for migration of NCCs acting as a chemoattractant and chemokinetic  
377 molecule<sup>59</sup> and it is involved in heart development. It has been shown recently that *Nrg1* is a direct  
378 transcriptional target gene of *Tbx1* in the multilineage progenitors (MLPs) in the mesoderm<sup>35</sup>.  
379 Therefore, alteration of Neuregulin signaling in *Tbx1* mutant embryo could contribute to explain  
380 failed cardiac contribution of the NCCs. Together, our analyses indicate that a combination of  
381 important signaling from the pharyngeal mesoderm to NCCs are affected in *Tbx1* mutant embryos  
382 and could contribute to failure of fate progression of CNCCs.

383 The pharyngeal endoderm is also an important source of signaling during development,  
384 including FGF ligands<sup>60</sup>, that could potentially affect CNCCs development. It will be interesting to  
385 evaluate how the exchange of signaling between the pharyngeal endoderm and NCCs are  
386 affected in the absence of *Tbx1*.

387 In conclusion, in this report we identified the transcriptional signature that defines the  
388 CNCCs and identified the gene expression dynamics that regulates CNCC fate progression into

389 smooth muscle of the OFT and PAAs. In addition, we highlight direct alteration of FGF signaling  
390 from the mesoderm to CNCCs resulting in an abnormal increase in the BMP pathway and failed  
391 cardiac contributions in the absence of *Tbx1* at a single cell level. Together our results allow a  
392 better understanding of the normal development of CNCCs and provide new insights into the  
393 origin of congenital heart defects associated with defective NCCs and 22q11.2DS.

394

## 395 **Methods**

### 396 **Mouse lines.**

397 The following transgenic mouse lines were used: *Wnt1-Cre*<sup>13</sup>, *ROSA26R-GFP*<sup>f/+</sup><sup>14</sup> that we refer  
398 to as *ROSA-EGFP*, *Tbx1*<sup>+/-</sup><sup>61</sup>, *Tbx1f*<sup>+/+</sup><sup>61</sup>. Mice were maintained on a mixed Swiss Webster  
399 genetic background. *Tbx2*<sup>f/+</sup> and *Tbx3*<sup>f/+</sup> mutant mouse lines were generated in Dr. Chenleng Cai's  
400 laboratory by inserting a two LoxP sites into the intron sequences flanking exon 2 of the *Tbx2*  
401 gene and exons 2-4 of *Tbx3* gene, by gene targeting using homologous recombination. When the  
402 genomic sequences between the LoxP sites are floxed out, the reading frame and T-Box domain  
403 of *Tbx2* and *Tbx3* are both disrupted. *Tbx2*<sup>f/+</sup> and *Tbx3*<sup>f/+</sup> mice were maintained on a mixed Swiss  
404 Webster and C557BL/6 genetic background. Mice and embryos resulting from the different  
405 crosses were genotyped by PCR using standard protocols from DNA extracted from toes tips or  
406 yolk sac. Animal experiments were carried out in agreement with the National Institutes of Health  
407 and the Institute for Animal Studies, Albert Einstein College of Medicine  
408 (<https://www.einsteinmed.org/administration/animal-studies/>) regulations. The IACUC number  
409 protocol is #00001034. Embryos were collected at different embryonic days dated from the day  
410 of the vaginal plug (E0.5). For each experiment, a representative result is presented from at least  
411 three analyzed embryos.

412

### 413 **Immunofluorescence staining on paraffin sections.**

414 Embryos were collected in cold 1x PBS (Phosphate Buffered Saline) and fixed in 4% PFA  
415 (Paraformaldehyde) for 1 hour at 4°C under constant agitation. Embryos were progressively  
416 dehydrated in ethanol then xylene and embedded in paraffin (Paraplast X-tra, Sigma P3808). The  
417 embryos were sectioned to 10µm thickness and sections were deparaffinized in xylene and  
418 progressively rehydrated in an ethanol series. Sections were incubated and boiled in antigen  
419 unmasking solution (Vector laboratories, H-3300) for 15 minutes. After cooling at room  
420 temperature, sections were washed in PBS containing 0.05% Tween (PBST) and blocked for 1  
421 hour in TNB buffer (0.1M Tris-HCl, pH 7.5, 0.15M NaCl, 0.5% Blocking reagent [PerkinElmer  
422 FP1020]) at room temperature. Then sections were incubated with primary antibodies diluted in  
423 TNB overnight at 4°C. Sections were washed in PBST and incubated with secondary antibodies  
424 diluted in TNB for 1 hour at room temperature. After washes in PBST, nuclei were stained with  
425 DAPI (1/1,000; Thermo Scientific, 62248) and slides were mounted in Fluoromount (Southern  
426 Biotech). Embryonic sections were imaged using a Zeiss Axio Imager M2 microscope with  
427 ApoTome.2 module. The following primary antibodies were used: goat anti-GFP (1/200, Abcam  
428 ab6673), mouse anti-alpha smooth muscle actin ACTA2) (1/200, Abcam ab7817), rabbit anti-  
429 αSMA (ACTA2; 1/200, Abcam ab5694), mouse anti-Isl1/2 (1/100, DSHB 40.2D6 and DSHB  
430 39.4D5), mouse anti-TBX2 (1/100, Santa Cruz sc514291), rabbit anti-TAGLN (1/200, Abcam  
431 ab14106), rabbit anti-pSMAD1/5/9 (1/100, Cell Signaling D5B10) and rabbit anti-TBX1 (1/100,  
432 Lifescience LS-C31179). Donkey secondary antibodies from Invitrogen (Thermo Fisher Scientific)  
433 were used (anti-goat, anti-mouse and anti-rabbit).

434

#### 435 **RNAscope.**

436 RNAscope on wholemount embryos:

437 Embryos were collected and dissected in 1x PBS at 4°C and fixed in 4% PFA overnight. Then  
438 embryos were dehydrated in progressive methanol washes and stored in 100% methanol at -  
439 20°C. Wholemount RNAscope was performed using RNAscope Multiplex Fluorescent Detection

440 Reagents v2 kit (Advanced Cell Diagnostics, ref 323110). Embryos were progressively rehydrated  
441 in 1x PBS containing 0.01% Tween (PBST) and were permeabilized using Protease III (Advanced  
442 Cell Diagnostics, ref 323110) for 20 minutes at room temperature followed by washes in PBST.  
443 Embryos were then incubated with 100µl of pre-warmed mixed C1, C2 and C3 (ratio 50:1:1,  
444 respectively) RNAscope probes at 40°C, overnight. After 3 washes in 0.2x SSC (Saline Sodium  
445 Citrate), 0.01%Tween, embryos were fixed in 4% PFA for 10 minutes at room temperature.  
446 Embryos were then incubated in Amp1 for 30 minutes at 40°C, Amp2 for 30 minutes at 40°C and  
447 Amp3 for 15 minutes at 40°C, with washes in 0.2x SSC, 0.01%Tween between each step.  
448 Tyramide Signal Amplification (TSA) solutions were prepared as follows: 1/500 for TSA-  
449 Fluorescein (Akoya Biosciences, NEL741001KT), 1/2000 for TSA-CY3 (Akoya Biosciences,  
450 NEL744001KT) and 1/1000 for TSA-CY5 (Akoya Biosciences, NEL745001KT). To reveal C1  
451 probes, embryos were incubated in HRP1-C1 for 15 minutes at 40°C then washed and incubated  
452 with the chosen TSA solution, 30 minutes at 40°C. The amplification reaction was blocked using  
453 HRP-Blocker during 15 minutes at 40°C. C2 and C3 probes were revealed following the previous  
454 steps and using HRP-C2 for C2 probes and HRP-C3 for C3 probes. Nuclei were stained overnight  
455 with DAPI. Wholemount embryos were imaged as Z-stacks using a Leica SP5 confocal  
456 microscope or a Nikon CSU-W1 spinning disk confocal microscope. 3D image reconstruction and  
457 analyses were performed using Fiji and ImarisViewer 9.8.0 software.

458

459 RNAscope on cryosections:

460 Embryos were collected and dissected in 1x PBS at 4°C then fixed in PFA 4% overnight and  
461 incubated in successive 10%, 20% and 30% sucrose (Sigma-Aldrich S8501) solutions and then  
462 embedded in OCT (Optimal Cutting Temperature compound). Embryos were stored at -80°C until  
463 they are used. RNAscope was performed on 10µm sections mounted on SuperFrost Plus slides  
464 (FisherScientific, 12-550-15) following the RNAscope Multiplex Fluorescent Reagent Kit v2 assay  
465 protocol from Advanced Cell Diagnostics.

466 Probes used for RNAscope: *Egfp* (400281, 400281-C3), *Tbx2* (448991), *Hoxb3* (515851), *Dlx2*  
467 (555951), *Bambi* (523071), *Hoxa2* (451261), *Gata3* (4033321-C2), *Isl1* (451931-C2), *Tbx3*  
468 (832891-C2), *Sox10* (435931-C2), *Msx2* (421851-C2), *Meox1* (530641-C2), *Dlx5* (478151-C3).

469

#### 470 **Histology and staining with Hematoxylin & Eosin.**

471 Fetuses were collected and dissected in 1x PBS and fixed overnight in 4% PFA. They were  
472 progressively dehydrated in ethanol and incubated in xylene prior to embedding in paraffin. Tissue  
473 sections of 12µm thickness were deparaffinized in xylene and progressively rehydrated in ethanol  
474 washes and incubated for 10 minutes in Hematoxylin (Sigma-Aldrich, HHS16) then rinsed in water  
475 and dehydrated in 70% ethanol. Sections were then incubated in alcoholic Eosin (70%) (Sigma-  
476 Aldrich, HT110116) solution and progressively dehydrated in ethanol and xylene washes prior to  
477 mounting in Permount mounting medium (Fisher Chemical SP15100). Sections were imaged  
478 using a Zeiss Axioskop 2 plus microscope.

479

#### 480 **Intracardiac India ink injection.**

481 Fetuses at E15.5 were dissected in 1x PBS and the chest was carefully opened to avoid damaging  
482 the cardiovascular system. A solution containing 50% India ink and 50% 1x PBS was injected into  
483 the left ventricle of the heart by blowing gently into an aspirator tube assembly connected to a  
484 microcapillary. Immediately after filling the left ventricle and arterial branches, the heart and aortic  
485 arch with arterial branches were imaged using a Leica MZ125 stereomicroscope.

486

#### 487 **scRNA-seq data generation.**

488 Embryos were collected and microdissected in 1x PBS at 4°C. Dissected tissues of interest were  
489 maintained in DMEM (Dulbecco's Modified Eagle Medium, GIBCO 11885084) at 4°C. For E8.5  
490 embryos, the rostral half of the embryos including the heart was collected. At E9.5 and E10.5 the  
491 pharyngeal region plus heart were collected. Pharyngeal arch 1 was removed at E10.5 as shown



492 in Fig. 1. Then, tissues were incubated in 1ml of 0.25% Trypsin-EDTA (GIBCO, 25200056)  
493 containing 50U/ml of DNase I (Milipore, 260913-10MU), at room temperature for 7 minutes. Next,  
494 heat inactivated FBS (Fetal Bovine Serum, ATCC, 30-2021) was added to stop the reaction at a  
495 final concentration of 10%, at 4°C. Dissociated cells were centrifugated for 5 minutes at 300 x g  
496 at 4°C and the supernatant was removed. Cells were then resuspended in 1x PBS without Ca<sup>2+</sup>  
497 and Mg<sup>2+</sup> (Coming, 21-031-cv) containing 10% FBS at 4°C and filtered with a 100µm cell strainer.  
498 A total of 1µl DAPI (1mM) (Thermo Fisher Scientific, D3571) was added before FACS using a BD  
499 FACS Aria II system. EGFP positive, DAPI negative cells were then centrifuged at 4°C, 5 minutes  
500 at 300 x g and resuspended in 50µl of 1xPBS without Ca<sup>2+</sup> and Mg<sup>2+</sup> with 10% FBS. Cells were  
501 then loaded in a 10x Chromium instrument (10x Genomics) using the Chromium Single Cell 3'  
502 Library & Reagent kit v2 or single index Chromium Next GEM Single Cell 3' GEM, Library & Gel  
503 Bead kit v3 or v3.1.

504

### 505 **Sequencing**

506 Sequencing of the DNA libraries was performed using an Illumina Hiseq4000 system (Genewiz  
507 Company, South Plainfield, NY, USA) with paired-end, 150 bp read length.

508

### 509 **scRNA-seq data analysis.**

510 CellRanger (v6.0.1, from 10x Genomics) was used to align scRNA-seq reads to the mouse  
511 reference genome (assembly and annotation, mm10-2020-A) to generate gene-by-cell count  
512 matrices. All the samples passed quality control measures for Cell Ranger version 6.0.1  
513 (Supplementary Table 1).

514 *Seurat analysis for filtering and clustering:*

515 Individual scRNA-seq sample data were analyzed using Seurat V4.0.5<sup>15</sup>, with parameters as  
516 recommended by Seurat software.

517 *Integrated scRNA-seq analysis:*



518 After individual samples were analyzed by Seurat for clustering, the data were integrated by the  
519 RISC software (v1.5) using the Reference Principal Component Integration (RPCI) algorithm for  
520 removing batch effects and aligning gene expression values between the control and *Tbx1* null  
521 samples at E9.5 and E10.5<sup>29</sup>. The integrated data were re-clustered by RISC, using parameters  
522 adjusted to match the cell type clusters in the Seurat results. Gene expression differences  
523 between control and *Tbx1* null embryos was determined by RISC software for each of the clusters  
524 at an adjusted p-value < 0.05 and log<sub>2</sub>(fold change) > 0.25. The GO enrichment for the  
525 differentially expressed genes were identified by clusterProfiler (v4.0.5)<sup>32</sup>. Cell compositions were  
526 computed from the integrated cell clusters and used for two-proportion Z-test as implemented in  
527 the R prop.test() function to evaluate the statistical significance in changes between control and  
528 null embryos.

#### 529 *Cell trajectory analysis:*

530 CellRank (v1.5.1)<sup>21</sup> was used to infer differentiation trajectory, focusing on determining the  
531 probability of cells to adopt the smooth muscle, *Acta2*<sup>+</sup> cell fate. The analysis used RNA velocity  
532 from Velocity (v0.17.17)<sup>62</sup> and scVelo (v0.2.4)<sup>62</sup>, and cell-cell similarity to infer trajectories and  
533 cell differentiation potential. The analysis was performed for all cells in either the E9.5 control  
534 sample or the two E10.5 control samples and then for the cells in the selected clusters that were  
535 predicted to have connections to the smooth muscle *Acta2*<sup>+</sup> cluster.

#### 536 *Cell-cell communication analysis:*

537 CellChat (v1.1.3)<sup>33</sup> was used to identify the ligand-receptor interactions between *Mesp1*<sup>Cre</sup>  
538 mesoderm lineage and NCC lineages and then compare the change between control and *Tbx1*  
539 null mutant data at p < 0.05. Data included ligands in the *Mesp1*<sup>Cre</sup> lineage and receptors in CNCC  
540 lineage.

541

542

543 **Data Availability**

544 All scRNA-seq datasets generated in this study have been submitted to GEO (Gene Expression  
545 Omnibus) repository July 13, 2022, and are awaiting approval.

546

547

## 548 References

549

- 550 1 Szabo, A. & Mayor, R. Mechanisms of Neural Crest Migration. *Annu Rev Genet* **52**, 43-63  
551 (2018). <https://doi.org/10.1146/annurev-genet-120417-031559>
- 552 2 Plein, A., Fantin, A. & Ruhrberg, C. Neural crest cells in cardiovascular development. *Curr*  
553 *Top Dev Biol* **111**, 183-200 (2015). <https://doi.org/10.1016/bs.ctdb.2014.11.006>
- 554 3 Kirby, M. L. & Waldo, K. L. Role of neural crest in congenital heart disease. *Circulation* **82**,  
555 332-340 (1990). <https://doi.org/10.1161/01.cir.82.2.332>
- 556 4 Goldmuntz, E. 22q11.2 deletion syndrome and congenital heart disease. *Am J Med Genet*  
557 *C Semin Med Genet* **184**, 64-72 (2020). <https://doi.org/10.1002/ajmg.c.31774>
- 558 5 Sato, T. S. *et al.* Neurocristopathies: Enigmatic Appearances of Neural Crest Cell-derived  
559 Abnormalities. *Radiographics* **39**, 2085-2102 (2019).  
560 <https://doi.org/10.1148/rg.2019190086>
- 561 6 Vitelli, F., Morishima, M., Taddei, I., Lindsay, E. A. & Baldini, A. Tbx1 mutation causes  
562 multiple cardiovascular defects and disrupts neural crest and cranial nerve migratory  
563 pathways. *Hum Mol Genet* **11**, 915-922 (2002). <https://doi.org/10.1093/hmg/11.8.915>
- 564 7 Saga, Y. *et al.* MesP1 is expressed in the heart precursor cells and required for the  
565 formation of a single heart tube. *Development* **126**, 3437-3447 (1999).  
566 <https://doi.org/10.1242/dev.126.15.3437>
- 567 8 Merscher, S. *et al.* TBX1 is responsible for cardiovascular defects in velo-cardio-  
568 facial/DiGeorge syndrome. *Cell* **104**, 619-629 (2001). [https://doi.org/10.1016/s0092-8674\(01\)00247-1](https://doi.org/10.1016/s0092-8674(01)00247-1)
- 570 9 Jerome, L. A. & Papaioannou, V. E. DiGeorge syndrome phenotype in mice mutant for the  
571 T-box gene, Tbx1. *Nat Genet* **27**, 286-291 (2001). <https://doi.org/10.1038/85845>
- 572 10 Lindsay, E. A. *et al.* Tbx1 haploinsufficiency in the DiGeorge syndrome region causes aortic  
573 arch defects in mice. *Nature* **410**, 97-101 (2001). <https://doi.org/10.1038/35065105>
- 574 11 Gandhi, S., Ezin, M. & Bronner, M. E. Reprogramming Axial Level Identity to Rescue  
575 Neural-Crest-Related Congenital Heart Defects. *Dev Cell* **53**, 300-315 e304 (2020).  
576 <https://doi.org/10.1016/j.devcel.2020.04.005>
- 577 12 Soldatov, R. *et al.* Spatiotemporal structure of cell fate decisions in murine neural crest.  
578 *Science* **364** (2019). <https://doi.org/10.1126/science.aas9536>
- 579 13 Jiang, X., Rowitch, D. H., Soriano, P., McMahon, A. P. & Sucov, H. M. Fate of the  
580 mammalian cardiac neural crest. *Development* **127**, 1607-1616 (2000).
- 581 14 Mao, X., Fujiwara, Y., Chapdelaine, A., Yang, H. & Orkin, S. H. Activation of EGFP  
582 expression by Cre-mediated excision in a new ROSA26 reporter mouse strain. *Blood* **97**,  
583 324-326 (2001). <https://doi.org/10.1182/blood.v97.1.324>
- 584 15 Hao, Y. *et al.* Integrated analysis of multimodal single-cell data. *Cell* **184**, 3573-3587  
585 e3529 (2021). <https://doi.org/10.1016/j.cell.2021.04.048>
- 586 16 Vincentz, J. W. *et al.* Twist1 controls a cell-specification switch governing cell fate  
587 decisions within the cardiac neural crest. *PLoS Genet* **9**, e1003405 (2013).  
588 <https://doi.org/10.1371/journal.pgen.1003405>

- 589 17 Minoux, M. & Rijli, F. M. Molecular mechanisms of cranial neural crest cell migration and  
590 patterning in craniofacial development. *Development* **137**, 2605-2621 (2010).  
591 [https://doi.org:10.1242/dev.040048](https://doi.org/10.1242/dev.040048)
- 592 18 Keyte, A. & Hutson, M. R. The neural crest in cardiac congenital anomalies. *Differentiation*  
593 **84**, 25-40 (2012). [https://doi.org:10.1016/j.diff.2012.04.005](https://doi.org/10.1016/j.diff.2012.04.005)
- 594 19 Kirby, M. L. & Hutson, M. R. Factors controlling cardiac neural crest cell migration. *Cell*  
595 *Adh Migr* **4**, 609-621 (2010). [https://doi.org:10.4161/cam.4.4.13489](https://doi.org/10.4161/cam.4.4.13489)
- 596 20 Arima, Y. *et al.* Preotic neural crest cells contribute to coronary artery smooth muscle  
597 involving endothelin signalling. *Nat Commun* **3**, 1267 (2012).  
598 [https://doi.org:10.1038/ncomms2258](https://doi.org/10.1038/ncomms2258)
- 599 21 Lange, M. *et al.* CellRank for directed single-cell fate mapping. *Nat Methods* **19**, 159-170  
600 (2022). [https://doi.org:10.1038/s41592-021-01346-6](https://doi.org/10.1038/s41592-021-01346-6)
- 601 22 Chen, J., Bardes, E. E., Aronow, B. J. & Jegga, A. G. ToppGene Suite for gene list  
602 enrichment analysis and candidate gene prioritization. *Nucleic Acids Res* **37**, W305-311  
603 (2009). [https://doi.org:10.1093/nar/gkp427](https://doi.org/10.1093/nar/gkp427)
- 604 23 Conway, S. J. *et al.* Decreased neural crest stem cell expansion is responsible for the  
605 conotruncal heart defects within the splotch (Sp(2H))/Pax3 mouse mutant. *Cardiovasc*  
606 *Res* **47**, 314-328 (2000). [https://doi.org:10.1016/s0008-6363\(00\)00098-5](https://doi.org/10.1016/s0008-6363(00)00098-5)
- 607 24 Mesbah, K. *et al.* Identification of a Tbx1/Tbx2/Tbx3 genetic pathway governing  
608 pharyngeal and arterial pole morphogenesis. *Hum Mol Genet* **21**, 1217-1229 (2012).  
609 [https://doi.org:10.1093/hmg/ddr553](https://doi.org/10.1093/hmg/ddr553)
- 610 25 Singh, R. *et al.* Tbx2 and Tbx3 induce atrioventricular myocardial development and  
611 endocardial cushion formation. *Cell Mol Life Sci* **69**, 1377-1389 (2012).  
612 [https://doi.org:10.1007/s00018-011-0884-2](https://doi.org/10.1007/s00018-011-0884-2)
- 613 26 Christoffels, V. M. *et al.* T-box transcription factor Tbx2 represses differentiation and  
614 formation of the cardiac chambers. *Dev Dyn* **229**, 763-770 (2004).  
615 [https://doi.org:10.1002/dvdy.10487](https://doi.org/10.1002/dvdy.10487)
- 616 27 Harrelson, Z. *et al.* Tbx2 is essential for patterning the atrioventricular canal and for  
617 morphogenesis of the outflow tract during heart development. *Development* **131**, 5041-  
618 5052 (2004). [https://doi.org:10.1242/dev.01378](https://doi.org/10.1242/dev.01378)
- 619 28 Aydogdu, N. *et al.* TBX2 and TBX3 act downstream of canonical WNT signaling in  
620 patterning and differentiation of the mouse ureteric mesenchyme. *Development* **145**  
621 (2018). [https://doi.org:10.1242/dev.171827](https://doi.org/10.1242/dev.171827)
- 622 29 Liu, Y., Wang, T., Zhou, B. & Zheng, D. Robust integration of multiple single-cell RNA  
623 sequencing datasets using a single reference space. *Nat Biotechnol* **39**, 877-884 (2021).  
624 [https://doi.org:10.1038/s41587-021-00859-x](https://doi.org/10.1038/s41587-021-00859-x)
- 625 30 Darrigrand, J. F. *et al.* Dullard-mediated Smad1/5/8 inhibition controls mouse cardiac  
626 neural crest cells condensation and outflow tract septation. *Elife* **9** (2020).  
627 [https://doi.org:10.7554/eLife.50325](https://doi.org/10.7554/eLife.50325)
- 628 31 Sato, A. *et al.* FGF8 signaling is chemotactic for cardiac neural crest cells. *Dev Biol* **354**,  
629 18-30 (2011). [https://doi.org:10.1016/j.ydbio.2011.03.010](https://doi.org/10.1016/j.ydbio.2011.03.010)
- 630 32 Yu, G., Wang, L. G., Han, Y. & He, Q. Y. clusterProfiler: an R package for comparing  
631 biological themes among gene clusters. *OMICS* **16**, 284-287 (2012).  
632 [https://doi.org:10.1089/omi.2011.0118](https://doi.org/10.1089/omi.2011.0118)
- 633 33 Jin, S. *et al.* Inference and analysis of cell-cell communication using CellChat. *Nat*  
634 *Commun* **12**, 1088 (2021). [https://doi.org:10.1038/s41467-021-21246-9](https://doi.org/10.1038/s41467-021-21246-9)
- 635 34 Zhang, Z., Huynh, T. & Baldini, A. Mesodermal expression of Tbx1 is necessary and  
636 sufficient for pharyngeal arch and cardiac outflow tract development. *Development* **133**,  
637 3587-3595 (2006). [https://doi.org:10.1242/dev.02539](https://doi.org/10.1242/dev.02539)

- 638 35 Nomaru, H. *et al.* Single cell multi-omic analysis identifies a Tbx1-dependent multilineage  
639 primed population in murine cardiopharyngeal mesoderm. *Nat Commun* **12**, 6645 (2021).  
640 <https://doi.org/10.1038/s41467-021-26966-6>
- 641 36 Kelly, R. G. The second heart field. *Curr Top Dev Biol* **100**, 33-65 (2012).  
642 <https://doi.org/10.1016/B978-0-12-387786-4.00002-6>
- 643 37 De Bono, C. *et al.* T-box genes and retinoic acid signaling regulate the segregation of  
644 arterial and venous pole progenitor cells in the murine second heart field. *Hum Mol Genet*  
645 **27**, 3747-3760 (2018). <https://doi.org/10.1093/hmg/ddy266>
- 646 38 Cai, C. L. *et al.* Isl1 identifies a cardiac progenitor population that proliferates prior to  
647 differentiation and contributes a majority of cells to the heart. *Dev Cell* **5**, 877-889 (2003).  
648 [https://doi.org/10.1016/s1534-5807\(03\)00363-0](https://doi.org/10.1016/s1534-5807(03)00363-0)
- 649 39 Sinha, T. *et al.* Loss of Wnt5a disrupts second heart field cell deployment and may  
650 contribute to OFT malformations in DiGeorge syndrome. *Hum Mol Genet* **24**, 1704-1716  
651 (2015). <https://doi.org/10.1093/hmg/ddu584>
- 652 40 Chen, L. *et al.* Transcriptional control in cardiac progenitors: Tbx1 interacts with the BAF  
653 chromatin remodeling complex and regulates Wnt5a. *PLoS Genet* **8**, e1002571 (2012).  
654 <https://doi.org/10.1371/journal.pgen.1002571>
- 655 41 Vitelli, F. *et al.* A genetic link between Tbx1 and fibroblast growth factor signaling.  
656 *Development* **129**, 4605-4611 (2002).
- 657 42 Abu-Issa, R., Smyth, G., Smoak, I., Yamamura, K. & Meyers, E. N. Fgf8 is required for  
658 pharyngeal arch and cardiovascular development in the mouse. *Development* **129**, 4613-  
659 4625 (2002).
- 660 43 Aggarwal, V. S. *et al.* Dissection of Tbx1 and Fgf interactions in mouse models of 22q11DS  
661 suggests functional redundancy. *Hum Mol Genet* **15**, 3219-3228 (2006).  
662 <https://doi.org/10.1093/hmg/ddl399>
- 663 44 Kelly, R. G. & Papaioannou, V. E. Visualization of outflow tract development in the  
664 absence of Tbx1 using an Fgf10 enhancer trap transgene. *Dev Dyn* **236**, 821-828 (2007).  
665 <https://doi.org/10.1002/dvdy.21063>
- 666 45 Theveniau-Ruissy, M. *et al.* The del22q11.2 candidate gene Tbx1 controls regional outflow  
667 tract identity and coronary artery patterning. *Circ Res* **103**, 142-148 (2008).  
668 <https://doi.org/10.1161/CIRCRESAHA.108.172189>
- 669 46 Racedo, S. E. *et al.* Reduced dosage of beta-catenin provides significant rescue of cardiac  
670 outflow tract anomalies in a Tbx1 conditional null mouse model of 22q11.2 deletion  
671 syndrome. *PLoS Genet* **13**, e1006687 (2017).  
672 <https://doi.org/10.1371/journal.pgen.1006687>
- 673 47 Smith, C. L. & Tallquist, M. D. PDGF function in diverse neural crest cell populations. *Cell*  
674 *Adh Migr* **4**, 561-566 (2010). <https://doi.org/10.4161/cam.4.4.12829>
- 675 48 Schliermann, A. & Nickel, J. Unraveling the Connection between Fibroblast Growth Factor  
676 and Bone Morphogenetic Protein Signaling. *Int J Mol Sci* **19** (2018).  
677 <https://doi.org/10.3390/ijms19103220>
- 678 49 Pera, E. M., Ikeda, A., Eivers, E. & De Robertis, E. M. Integration of IGF, FGF, and anti-  
679 BMP signals via Smad1 phosphorylation in neural induction. *Genes Dev* **17**, 3023-3028  
680 (2003). <https://doi.org/10.1101/gad.1153603>
- 681 50 Morikawa, Y. & Cserjesi, P. Cardiac neural crest expression of Hand2 regulates outflow  
682 and second heart field development. *Circ Res* **103**, 1422-1429 (2008).  
683 <https://doi.org/10.1161/CIRCRESAHA.108.180083>
- 684 51 Chen, Y. H., Ishii, M., Sun, J., Sucov, H. M. & Maxson, R. E., Jr. Msx1 and Msx2 regulate  
685 survival of secondary heart field precursors and post-migratory proliferation of cardiac  
686 neural crest in the outflow tract. *Dev Biol* **308**, 421-437 (2007).  
687 <https://doi.org/10.1016/j.ydbio.2007.05.037>

- 688 52 Engleka, K. A. *et al.* Islet1 derivatives in the heart are of both neural crest and second  
689 heart field origin. *Circ Res* **110**, 922-926 (2012).  
690 <https://doi.org/10.1161/CIRCRESAHA.112.266510>
- 691 53 Lepore, J. J. *et al.* GATA-6 regulates semaphorin 3C and is required in cardiac neural  
692 crest for cardiovascular morphogenesis. *J Clin Invest* **116**, 929-939 (2006).  
693 <https://doi.org/10.1172/JCI27363>
- 694 54 Xu, H. *et al.* Tbx1 has a dual role in the morphogenesis of the cardiac outflow tract.  
695 *Development* **131**, 3217-3227 (2004). <https://doi.org/10.1242/dev.01174>
- 696 55 Hu, T. *et al.* Tbx1 regulates fibroblast growth factors in the anterior heart field through a  
697 reinforcing autoregulatory loop involving forkhead transcription factors. *Development* **131**,  
698 5491-5502 (2004). <https://doi.org/10.1242/dev.01399>
- 699 56 Kodo, K. *et al.* Regulation of Sema3c and the Interaction between Cardiac Neural Crest  
700 and Second Heart Field during Outflow Tract Development. *Sci Rep* **7**, 6771 (2017).  
701 <https://doi.org/10.1038/s41598-017-06964-9>
- 702 57 Feng, J. *et al.* BMP4 enhances foam cell formation by BMPR-2/Smad1/5/8 signaling. *Int*  
703 *J Mol Sci* **15**, 5536-5552 (2014). <https://doi.org/10.3390/ijms15045536>
- 704 58 Jin, X. *et al.* Fstl1 Promotes Glioma Growth Through the BMP4/Smad1/5/8 Signaling  
705 Pathway. *Cell Physiol Biochem* **44**, 1616-1628 (2017). <https://doi.org/10.1159/000485759>
- 706 59 De Bellard, M. E. *et al.* Neuregulin-1 is a chemoattractant and chemokinetic molecule for  
707 trunk neural crest cells. *Dev Dyn* **247**, 888-902 (2018). <https://doi.org/10.1002/dvdy.24625>
- 708 60 Park, E. J. *et al.* Required, tissue-specific roles for Fgf8 in outflow tract formation and  
709 remodeling. *Development* **133**, 2419-2433 (2006). <https://doi.org/10.1242/dev.02367>
- 710 61 Arnold, J. S. *et al.* Inactivation of Tbx1 in the pharyngeal endoderm results in 22q11DS  
711 malformations. *Development* **133**, 977-987 (2006). <https://doi.org/10.1242/dev.02264>
- 712 62 Bergen, V., Lange, M., Peidli, S., Wolf, F. A. & Theis, F. J. Generalizing RNA velocity to  
713 transient cell states through dynamical modeling. *Nat Biotechnol* **38**, 1408-1414 (2020).  
714 <https://doi.org/10.1038/s41587-020-0591-3>

716

## 717 Acknowledgements

718 We thank members of the Genomics core, Flow Cytometry and Analytical Imaging facilities at  
719 Albert Einstein College of Medicine. We are grateful to Professor Chenleng Cai for *Tbx2<sup>f/+</sup>* and  
720 *Tbx3<sup>f/+</sup>* mice. We thank Professor Robert G. Kelly for insightful comments on the manuscript. This  
721 work was supported by grants from the National Institutes of Health (P01HD070454,  
722 R01HL138470, R01HL153920, R01HL163667) and by grant from the Fondation Leducq  
723 (Transatlantic Network of Excellence 15CVD01). C.D thanks the Fondation Bettencourt-Schueller  
724 and the Philippe Foundation for their financial support.

725

## 726 Author contributions



727 C.D. and B.E.M. designed the study and experiments. C.D. performed all wet laboratory  
728 experiments. C.D., Y.L., A.F., A.V. performed computational analysis of single cell RNA-  
729 sequencing data. Y.L., A.F. and D.Z. provided bioinformatics expertise and guidance. C.D. and  
730 B.E.M wrote the manuscript. All authors read, intellectually contributed, edited, and approved the  
731 manuscript.

732

### 733 **Competing interests**

734 The authors declare no competing interests.

735

736

### 737 **Figure Legends**

738

739 **Figure 1: Single cell RNA-seq of NCCs from mouse embryos at E8.5-E10.5 reveals**  
740 **transcriptional heterogeneity within the pharyngeal region.**

741 A-C) *Wnt1-Cre;ROSA-EGFP* genetic lineage tracing shows the distribution of NCCs within the  
742 pharyngeal region and outflow tract of E8.5 (A), E9.5 (B) and E10.5 (C) embryos. The region  
743 rostral to the white dotted line of the embryo at E8.5 (A) and the pharyngeal region between the  
744 dotted lines in embryos at E9.5 and E10.5 including the heart were microdissected and EGFP  
745 positive NCCs were used for scRNA-seq. D-F) Seurat UMAP (Uniform Manifold Approximation  
746 and Projection) plots with cluster annotations of scRNA-seq data of NCCs at E8.5 (D), E9.5 (E)  
747 and E10.5 (F). (G-I) Expression of genes at E8.5 (G), E9.5 (H) and E10.5 (I) with highest  
748 expression in blue and lowest expression in gray. J-L) Wholemount RNAscope *in situ*  
749 hybridization of *Wnt1-Cre;ROSA-EGFP* embryos (n=3) at E8.5 (J), E9.5 (K) and E10.5 (L) with  
750 probes for *Sox10*, *Hoxb3* and *Egfp*, together and separated (colors are indicated above embryos).  
751 *Hoxa2* was examined at E9.5 as indicated. PA, pharyngeal arch; OFT, outflow tract; OV, otic  
752 vesicle. Scale bar: 100µm in J, 200µm in K and 300µm in L.

753

754 **Figure 2: Transcriptional dynamics of cardiac NCCs at E9.5.**

755 A) UMAP plots of scRNA-seq data with genes that mark CNCCs identified by expression of *Acta2*,  
756 *Isl1*, *Gata3*, *Hand2*, *Msx2*, *Tbx2* and *Tbx3* with respect to *Hoxb3* (PA3) and *Dlx5* (distal PA1, 2,  
757 3) expression. B) Immunostaining on traverse sections through *Wnt1-Cre;ROSA-EGFP* embryos  
758 showing Cre-activated EGFP (green), ACTA2 and ISL1 protein expression. Nuclei (blue) are  
759 labeled with DAPI. Arrowheads indicate CNCCs expressing ISL1 (n=3). C-E) RNAscope analysis  
760 of *Wnt1-Cre;ROSA-EGFP* embryos (n=3-4) for *Egfp*, *Gata3* (C), *Isl1* (D) and *Msx2* (E) expression.  
761 Nuclei (blue) are labeled with DAPI. Arrowheads indicate the expression of *Gata3*, *Isl1* and *Msx2*  
762 in CNCCs within the OFT. F,G) Wholemount RNAscope analysis of *Wnt1-Cre;ROSA-EGFP*  
763 embryos at 20 somites (F) and 24 somites (G) where the position of the OFT is indicated (white  
764 arrowhead). H) PHATE (Potential of Heat-diffusion for Affinity-based Transition Embedding) map  
765 of NCCs in clusters C1, C3, C4, C5 and C14 using Louvain clustering. I) PHATE map colored by  
766 cell fate probabilities, showing how each cell is likely to transition to CNCCs as defined by  
767 CellRank (yellow represent high cell fate probabilities). J) PHATE maps with expression of marker  
768 genes of CNCCs at different states of differentiation towards smooth muscle *Acta2* expressing  
769 cells. K) Heatmap from CellRank showing the expression of marker genes whose expression  
770 correlates with cardiac fate probabilities as latent time, with cells order by fate probabilities as  
771 latent time (see Supplementary data 4 for full list of genes). NT, neural tube; end, endoderm; OFT,  
772 outflow tract; PA, pharyngeal. Scale bars: 100µm.

773

774 **Figure 3: Transcriptional dynamics of cardiac NCCs at E10.5.**

775 A) Seurat UMAP plots of scRNA-seq data from NCC populations with expression of marker genes.  
776 B-G) RNAscope *in situ* hybridization on traverse sections of *Wnt1-Cre;ROSA-EGFP* embryos  
777 (n=3-5) for *Egfp*, *Isl1* and *Gata3* (B), *Egfp*, *Tbx2* and *Gata3* (C), *Egfp* and *Tbx2* (D) and *Egfp* and  
778 *Tbx3* (E) expression. Nuclei stained with DAPI are in blue. *Isl1* and *Gata3* are expressed in NCCs  
779 within of the OFT (white arrowheads in B) and at the level of the dorsal aortic sac wall and aortic

780 sac protrusion (blue arrowheads in B). *Gata3* but not *Isl1* is expressed in the more proximal part  
781 of OFT (red arrowheads in B). *Tbx2* and *Gata3* expression overlaps in the dorsal wall of the OFT  
782 (white arrowheads in C). *Tbx2* and *Tbx3* are expressed in the mesenchyme dorsal to the aorta  
783 surrounding the PAAs at the level of the PA3-6 (white arrowheads in D and E). F, G)  
784 Immunostaining on traverse sections at the level of the OFT of *Wnt1-Cre;ROSA-EGFP* embryos  
785 (n=3) showing GFP, ISL1 and ACTA2 expression (F) and GFP, TBX2 and TAGLN expression  
786 (G). Expression of ISL1 is in smooth muscle cells of the OFT cushions (arrowheads in F) and  
787 expression of TBX2 is in smooth muscle cells of the PAAs (arrowheads in G). H) Schematic  
788 representation of a transverse section at the level of the OFT summarizing *Tbx2*, *Tbx3*, *Isl1*, *Gata3*  
789 and *Acta2* expression in CNCCs at E10.5. I) CellRank UMAP plot directed by RNA velocity and  
790 cell-cell similarity for clusters C2, C3, C4 and C10 from the feature plot in (A). J) UMAP plot for  
791 cell fate probabilities of CNCCs differentiating towards smooth muscle cells. K) Directed PAGA  
792 plot of NCCs. Pie charts show summarized fate probabilities of individual clusters, with blue  
793 representing the proportion of cells in each cluster with high probability to become smooth muscle  
794 expressing CNCCs of cluster, C10. L) Heatmap from CellRank showing the expression of  
795 selected genes whose expression correlates with transitions of CNCCs fate probabilities, with  
796 cells ordered by smooth muscle fate probabilities as latent time (see Supplementary data 5 for  
797 full list of genes). M) UMAP plots showing expression of marker genes in CNCCs. N) GO  
798 enrichment analysis of four groups of genes between *Bmp4* and *Gata6* (defined by their  
799 pseudotime; Supplementary data 6). Example of genes for each selected GO: biological  
800 processes are provided. Size of the dots indicate adjusted p-value (FDR B&Y). NT, neural tube;  
801 end, endoderm; PAA, pharyngeal arch artery. Scale bars: 100µm.

802

803 **Figure 4: *Tbx2* and *Tbx3* are required together for arterial branching from the aortic arch.**

804 A-D) Intracardiac ink injection of control (A) and *Wnt1-Cre;Tbx2<sup>ff</sup>;Tbx3<sup>ff</sup>* conditional null mutant  
805 embryos at E15.5 (B,C). Double *Tbx2/Tbx3* cKO embryos have a partially penetrant aberrant



806 retro-esophageal right subclavian artery (ARSA) (B). D-I) Haematotoxin and Eosin staining on  
807 traverse sections of control (D,E) and *Tbx2/Tbx3* cKO mutant embryos (F-I) at E15.5. Panels F  
808 and J show a *Tbx2/3* cKO embryo with ARSA and panels H and I shows a *Tbx2/3* cKO embryo  
809 with a normal right subclavian artery. J-K) Immunofluorescence on coronal sections of controls at  
810 E11.5 (I) and *Tbx2/3* cKO embryos (K,L), at the level of the pharyngeal arch arteries for GFP and  
811 ACTA2 expression. Nuclei are stained with DAPI. Right panels are high magnification of the  
812 dashed regions in J, K and L. Note the strong reduction of ACTA2 expression in the right 4<sup>th</sup> PAA  
813 in *Tbx2/3* conditional mutant embryos compared to control embryos. M) Table of the  
814 cardiovascular defects in *Tbx2/Tbx3* conditional mutants. RSA, right subclavian artery; RCC, right  
815 common carotid; LCC, Left common carotid; BA, brachiocephalic artery; Ao, aorta; LSA, left  
816 subclavian artery; PT, pulmonary trunk; E, esophagus; PAA, pharyngeal arch artery.

817

818 **Figure 5: scRNA-seq identifies upregulation of the BMP pathway by inactivation of *Tbx1* at**  
819 **E9.5.**

820 A) *Wnt1-Cre;ROSA-EGFP* lineage tracing (green) shows mis-localization and reduced number of  
821 NCCs within the pharyngeal region of *Tbx1* null embryos (red arrow). DAPI is in blue. NCCs from  
822 the region between the two dashed lines were used for scRNA-seq. B) RISC UMAP plot of  
823 integrated scRNA-seq data from NCCs of control and *Tbx1* null embryos. C) UMAP plots colored  
824 by clusters from control (left) and *Tbx1* null embryos (right). D) Stack bar graph shows proportion  
825 of NCCs in indicated clusters, computed as the number of cells in these clusters divided by total  
826 number of cells in control or *Tbx1* null embryos. Two proportion z test was used to evaluate cell  
827 proportion differences between control and *Tbx1* null embryos (cluster C3: P-value = 1.14e-56;  
828 C4: P-value = 9.24e-15; C5: P-value = 1.46e-8; C8: P-value = 1.23e-5; C9: P-value = 4.32e-3;  
829 C12: P-value: 0.66) (\*, P-value < 0.05%; ns, not significantly different) E) Scatter plot shows  
830 differential gene expression in cluster C8 from control and *Tbx1* null embryos at E9.5.  
831 Representative DEGs in BMP (red) and MAPK (purple) pathways are indicated. F-G) GO

832 enrichment analysis using clusterProfiler for upregulated (F) and downregulated (G) genes in C8  
833 of *Tbx1* null embryos. Note upregulation of genes involved in the BMP pathway and  
834 downregulation of genes in the MAPK pathway. The Category Netplots links genes with Gene  
835 Ontology terms. H) UMAP plots show expression level (purple) of *Msx2*, *Gata3* and *Spry4* in  
836 NCCs split by control and *Tbx1* null embryos. I) *Msx2*, *Bambi* and *Egfp* wholemount RNAscope  
837 *in situ* hybridization with DAPI of control and *Tbx1* null embryos (n=3-7). The arrowheads indicate  
838 ectopic expression of *Msx2* and *Bambi* in *Tbx1* null embryos. J) *Egfp*, *Msx2* and *Bambi* RNAscope  
839 assays on transverse sections of control and *Tbx1* null embryos (n=3) showing ectopic and dorsal  
840 expression of *Msx2* and *Bambi* in migrating NCCs (red arrowheads). *Msx2* and *Bambi* expression  
841 are absent in the proximal part of the PA2 and PA3 of control embryos (white arrowheads). K)  
842 Fluorescent immunostaining for GFP and P-SMAD1/5/9 on transverse sections of control (n=5)  
843 and *Tbx1* null (n=4) embryos shows increase in P-SMAD1/5/9 in NCCs of PA2-3 (arrowheads).  
844 L) Schematic representation of control (left) and *Tbx1* null (right) sections at E9.5 showing  
845 reduced CNCCs contributing the shortened OFT and ectopic posterior BMP signaling. PA,  
846 pharyngeal arch; OV, otic vesicle; OFT, outflow tract; NT, neural tube; end, endoderm. Scale bars:  
847 100 $\mu$ m.

848

849 **Figure 6: Cell-cell communication from the mesoderm to NCCs is altered in the absence of**  
850 ***Tbx1* at E9.5.**

851 A) Schematic representation of a transverse section showing signaling (arrows) from pharyngeal  
852 mesoderm cells (blue) to NCCs (yellow) in the caudal pharyngeal apparatus. B) Bubble plots  
853 show representative cell-cell signaling from *Mesp1*<sup>Cre</sup> derived mesodermal cells to NCCs that  
854 were significantly altered (p-value indicated by size of dot and color; right) in *Tbx1* mutant  
855 embryos. Each dot represents a ligand-receptor pair interaction (Y-axis) between a specific  
856 cluster in the mesoderm cells and NCCs (X-axis). Clusters include anterior and posterior second  
857 heart field (aSHF, pSHF) and the multilineage progenitors (MLP). C) UMAP from integration of

858 two replicates of *Mesp1<sup>Cre</sup>;ROSA-EGFP* (CTRL) and *Mesp1<sup>Cre</sup>;Tbx1<sup>ff</sup>;EGFP* (*Tbx1* cKO)  
859 datasets. D) UMAP plots showing *Isl1* expression in control and *Tbx1* cKO cells. E-K) UMAP plots  
860 showing the expression of ligand genes including *Wnt5a* (E), *Wnt2* (F), *Sema3c* (G), *Pdgfa* (H),  
861 *Nrg1* (I), *Fgf10* (J) and *Edn3* (K) in control and *Tbx1* cKO embryos. Arrows indicate cell clusters  
862 with gene expression changes in *Tbx1* cKO embryos.

863

864 **Figure 7: Failure of CNCC cell fate progression by loss of *Tbx1* at E10.5.**

865 A) The NCCs between the dotted lines and heart in control and *Tbx1* null embryos were used for  
866 scRNA-seq. B) RISC UMAP plot of integrated scRNA-seq data from NCCs of two replicates of  
867 control and *Tbx1* null embryos. C) UMAP plots of pharyngeal and heart clusters from control (left)  
868 and *Tbx1* null (right) embryos. D) Stack bar graph shows proportions of NCCs in selected clusters  
869 divided by the total cell number of cells in control or *Tbx1* null replicates. The proportion of NCCs  
870 from *Tbx1* null embryos in cluster C10 is strongly reduced but not in C4. Two proportion z test  
871 was used to evaluate cell proportion differences between control and *Tbx1* null embryos. (\*, P-  
872 value < 0.05%; ns, not significantly different). E) UMAP plot colored by cell fate probabilities. F)  
873 UMAP plots showing expression level of *Tbx2*, *Tbx3*, *Isl1*, *Msx2*, *Gata3*, *Dkk1* in NCCs from  
874 control or *Tbx1* null embryos in pharyngeal NCC clusters. *Msx2*, *Gata3* and *Dkk1* show increased  
875 expression in cluster C4. G) GO analysis for downregulated genes in C4. H) GO analysis of  
876 upregulated genes in C10. I) Fluorescent immunostaining for GFP (green) and ISL1 (red) with  
877 DAPI (blue) on transverse sections of control (n=4) and *Tbx1* null (n=3) embryos. There is reduced  
878 ISL1 positive NCCs (arrowheads). J) Fluorescent immunostaining for GFP (green), TBX2 (red),  
879 and ACTA2 (grey) on transverse sections of control (n=4) and *Tbx1* null (n=3) embryos, DAPI is  
880 in blue. Expression of TBX2 in NCCs is lateral to the pharyngeal endoderm (end; white  
881 arrowheads). There are fewer CNCCs expressing ACTA2 within the OFT of *Tbx1* null embryos  
882 (red arrowhead). NT, neural tube; end, endoderm; OFT, outflow tract. Scale bars: 100µm

883

884 **Figure 8: Model of multistep specification to form CNCCs and the signaling pathways**  
885 **disrupted by inactivation of *Tbx1*.**

886 A) Colors indicate cell fate progression of pharyngeal NCCs (light yellow) towards vascular  
887 smooth muscle cells (red). Step 1 shows the transition between pharyngeal NCCs expressing  
888 *Tbx2/3* to cells expressing markers of CNCCs (P-CNCCs). Step 2 shows the transition in which  
889 some cells directly differentiate to smooth muscle of PAA-CNCCs, while the majority migrate and  
890 enter the OFT as OFT-CNCCs and express *Gata3/Is1* and Step 3 shows the transition to SM-  
891 CNCCs expressing *Acta2*. The graph shows the relative change of biological gene ontology terms  
892 during the three transitions of CNCCs to smooth muscle cells. B) Model of non-autonomous  
893 signaling between the mesoderm (bottom box) and NCCs (upper box) highlighting the BMP and  
894 FGF-MAPK pathways in control (left) and how signaling is disrupted in the absence of *Tbx1* (gray  
895 arrows; right). Loss of FGF signaling (red, down arrow) from the mesoderm results in an increase  
896 of BMP pathway genes (gray inhibitory arrow; red, up arrow) and decrease of MAPK signaling  
897 (gray arrow; red, down arrow) in pharyngeal NCCs. This leads to failure of cardiac fate  
898 progression with reduced number of CNCCs and reduced number of SM-CNCCs (gray arrows)  
899 with aortic arch/branching defects and failed OFT septation (persistent truncus arteriosus).

900

901

902 **Supplementary table 1: Summary of scRNA-seq experiments.** This is summary of the  
903 scRNA-seq experiments shown in Figures 1, 2, 3, 5 and 7.

904

905 **Supplementary Figure 1: *Dlx* and *Hox* genes provide proximal-distal and anterior-posterior**  
906 **identities of NCCs in the pharyngeal arches, respectively.**

907 A) UMAP plots showing expression levels of *Hoxb3*, *Hoxa2*, *Sox10*, *Dlx2*, *Dlx5* and *Dlx6* genes  
908 in cell specific clusters in scRNA-seq data of NCCs at E9.5. B) Wholemount RNAscope *in situ*

909 hybridization of *Wnt1-Cre;ROSA-EGFP* embryos at E9.5 with probes for *Egfp*, *Dlx2* and *Dlx5*. PA,  
910 pharyngeal arch. Scale bar: 200µm. This figure is related to Figure 1.

911

912 **Supplementary Figure 2: TBX1 expression is not detected in NCCs at E8.5, E9.5 and E10.5.**

913 Immunostaining for EGFP (green) and TBX1 (red) on sagittal sections of *Wnt1-Cre;ROSA26-*  
914 *EGFP* embryos E8.5 (A) (n=3) and E9.5 (B) (n=6) and on transverse sections of *Wnt1-*  
915 *Cre;ROSA26-EGFP* embryos at E10.5 (C) (n=5). Note that TBX1 is not noticeably expressed in  
916 NCCs, but it is expressed in adjacent mesodermal cells. PA, pharyngeal arch; NT, neural tube;  
917 end, endoderm; OFT, outflow tract. Scale bars: 100 µm.

918

919 **Supplementary Figure 3: Conditional deletion of *Tbx1* in NCCs does not affect heart**  
920 **development.**

921 Hematoxylin and eosin staining on *Wnt1-Cre;Tbx1<sup>fl/+</sup>* (n=3) and *Wnt1-Cre;Tbx1<sup>fl/fl</sup>* (n=3) embryos  
922 at E14.5 showing normal aorta and pulmonary trunk septation (A,B) and normal interventricular  
923 septation in *Wnt1-Cre;Tbx1<sup>fl/fl</sup>* embryos (C,D). Ao, aorta; PT, pulmonary trunk; RA, right atrium;  
924 LA, left atrium; RV, right ventricle; LV, left ventricle. Scale bars: 500 µm.

925

926 **Supplementary Figure 4: Bubble plots for all ligand-receptor pairs showing significant cell-**  
927 **cell signaling changes from mesodermal cells to NCCs in control and *Tbx1* mutant**  
928 **embryos at E9.5.** This version is the complete version compared to the image shown in Fig. 6B.

929

930

931 **Supplementary data 1: Marker genes and statistics of cell clusters from scRNA-seq of**  
932 **NCCs at E8.5.** These data are related to Fig. 1.

933

934 **Supplementary data 2: Marker genes and statistics of cell clusters from scRNA-seq of**

935 **NCCs at E9.5.** These data are related to Fig. 1 and 2.

936

937 **Supplementary data 3: Marker genes and statistics of cell clusters from scRNA-seq of**

938 **NCCs at E10.5.** These data are related to Fig. 1 and 3.

939

940 **Supplementary data 4: Heatmap of gene expression that correlates with cardiac fate**

941 **probabilities with cells ordered by fate probabilities at E9.5.** This heatmap is the complete

942 version of the selected genes shown in Fig. 2.

943

944 **Supplementary data 5: Heatmap of gene expression that correlates with cardiac fate**

945 **probabilities with cells ordered by fate probabilities at E10.5.** This heatmap is the complete

946 version of the selected genes shown in Fig. 3.

947

948 **Supplementary data 6: Gene ontology biological processes and disease processes of**

949 **lineage driver genes at E10.5.** These are the complete lists of gene ontology biological

950 processes and disease processes in each group of genes after dividing the ordered gene list in

951 Supplementary data 5 into four groups of equal number of genes from *Bmp4* to *Gata6*.

952

953 **Supplementary data 7: List of differentially expressed genes and statistics for each NCC**

954 **cluster of integrated data from control and *Tbx1* null embryos at E9.5.** This list is associated

955 with the data shown in Fig. 5B and C.

956

957 **Supplementary data 8: Gene ontology biological processes of upregulated genes in**

958 **proximal PA2 (C8 in Figure 5) of control and *Tbx1* null embryos at E9.5.** This is a complete

959 version of the data shown in Fig. 5F.

960

961 **Supplementary data 9: Gene ontology biological processes of downregulated genes in**  
962 **proximal PA2 (C8 in Figure 5) of control and *Tbx1* null embryos at E9.5.** This is a complete  
963 version of the data shown in Fig. 5G.

964

965 **Supplementary data 10: List of differentially expressed genes and statistics for each cell**  
966 **cluster of integrated data from control and *Tbx1* null embryos at E10.5.** This list is related  
967 to data shown in Fig. 7B and C.

968

969 **Supplementary data 11: Gene ontology biological processes of downregulated genes in**  
970 **pharyngeal NCCs (C4 in Figure 7) from control and *Tbx1* null embryos at E10.5.** This is a  
971 complete version of the data shown in Fig. 7G.

972

973 **Supplementary data 12: Gene ontology biological processes of upregulated genes in OFT-**  
974 **CNCCs (C10 in Figure 7) from control and *Tbx1* null embryos at E10.5.** This is a complete  
975 version of the data shown in Fig. 7H







## Figure 2

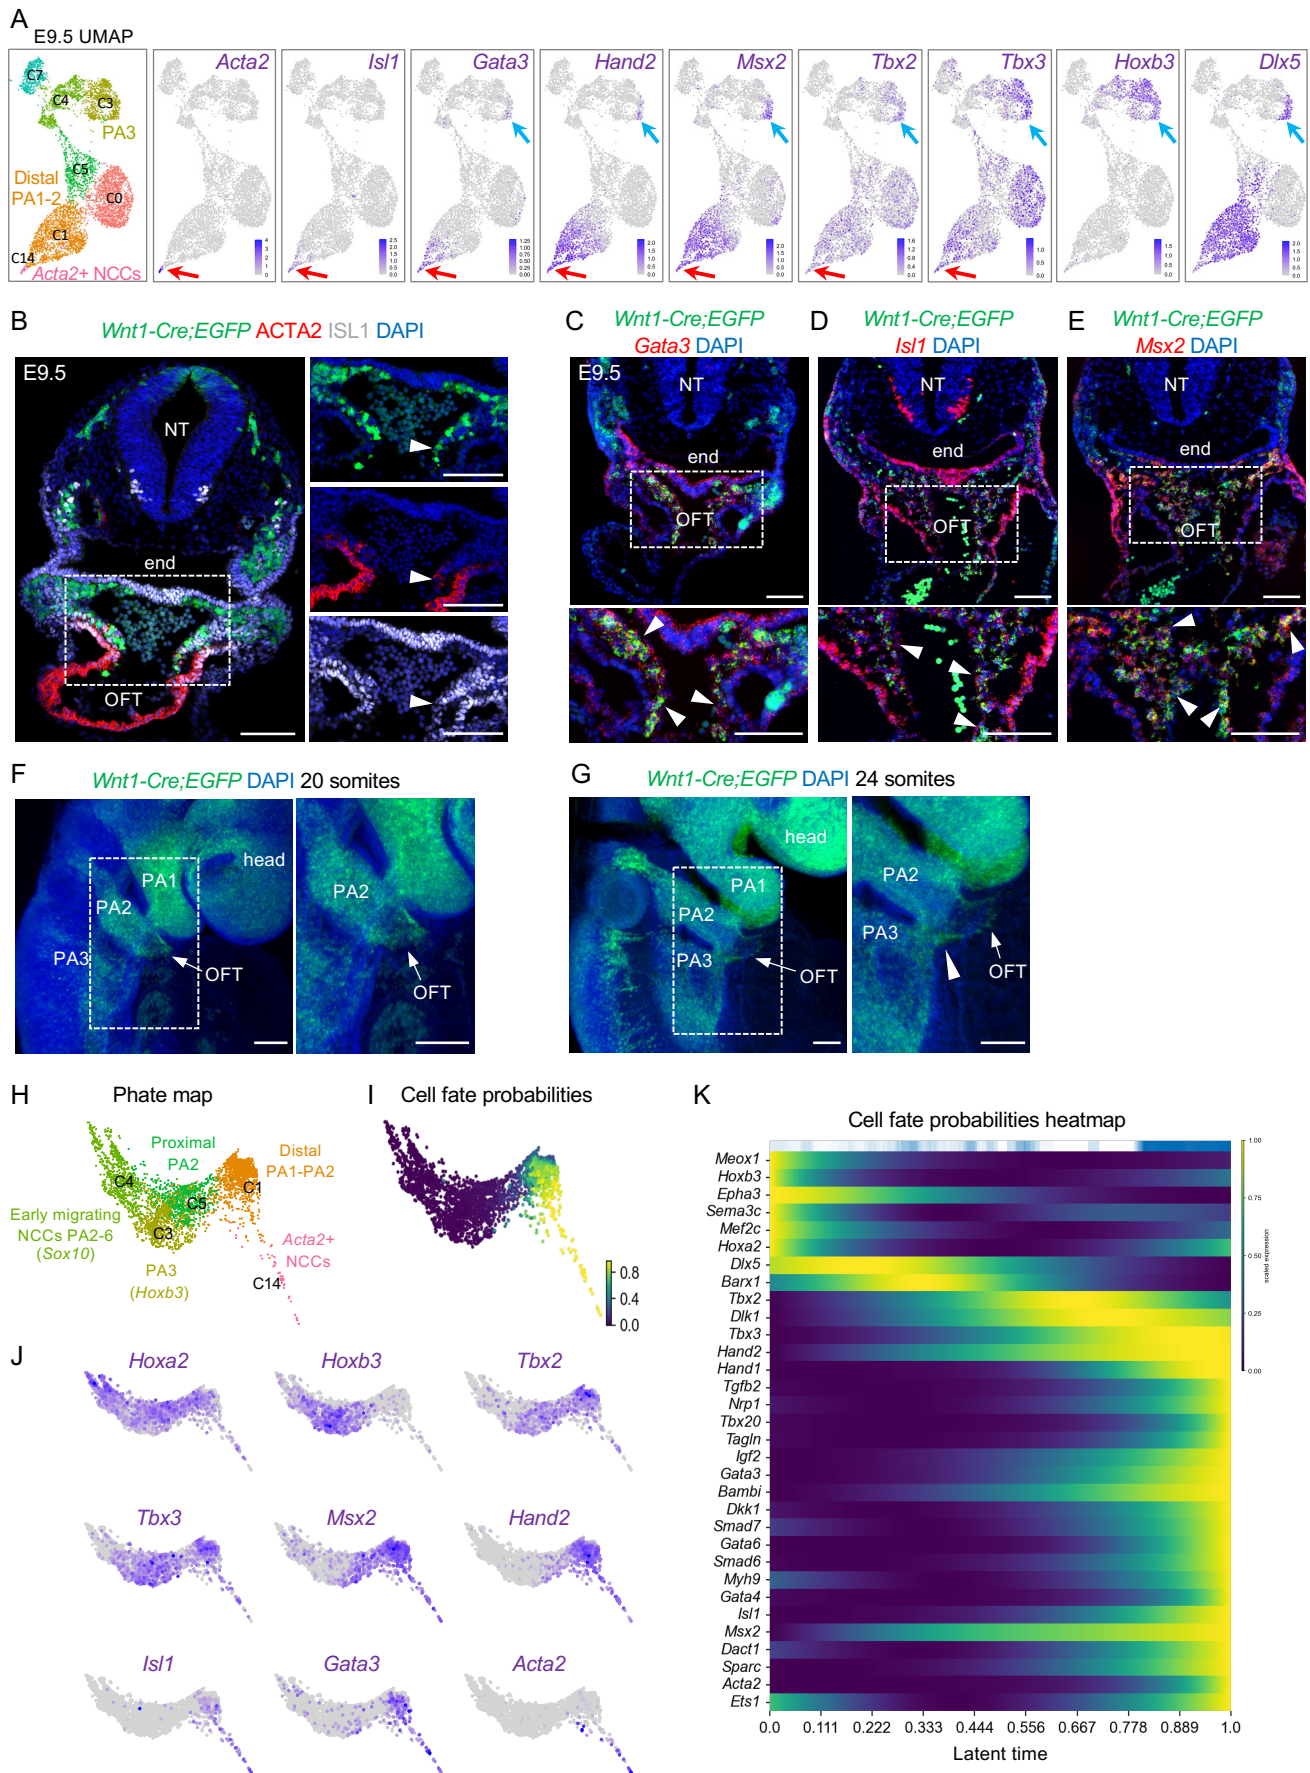

## Figure 3

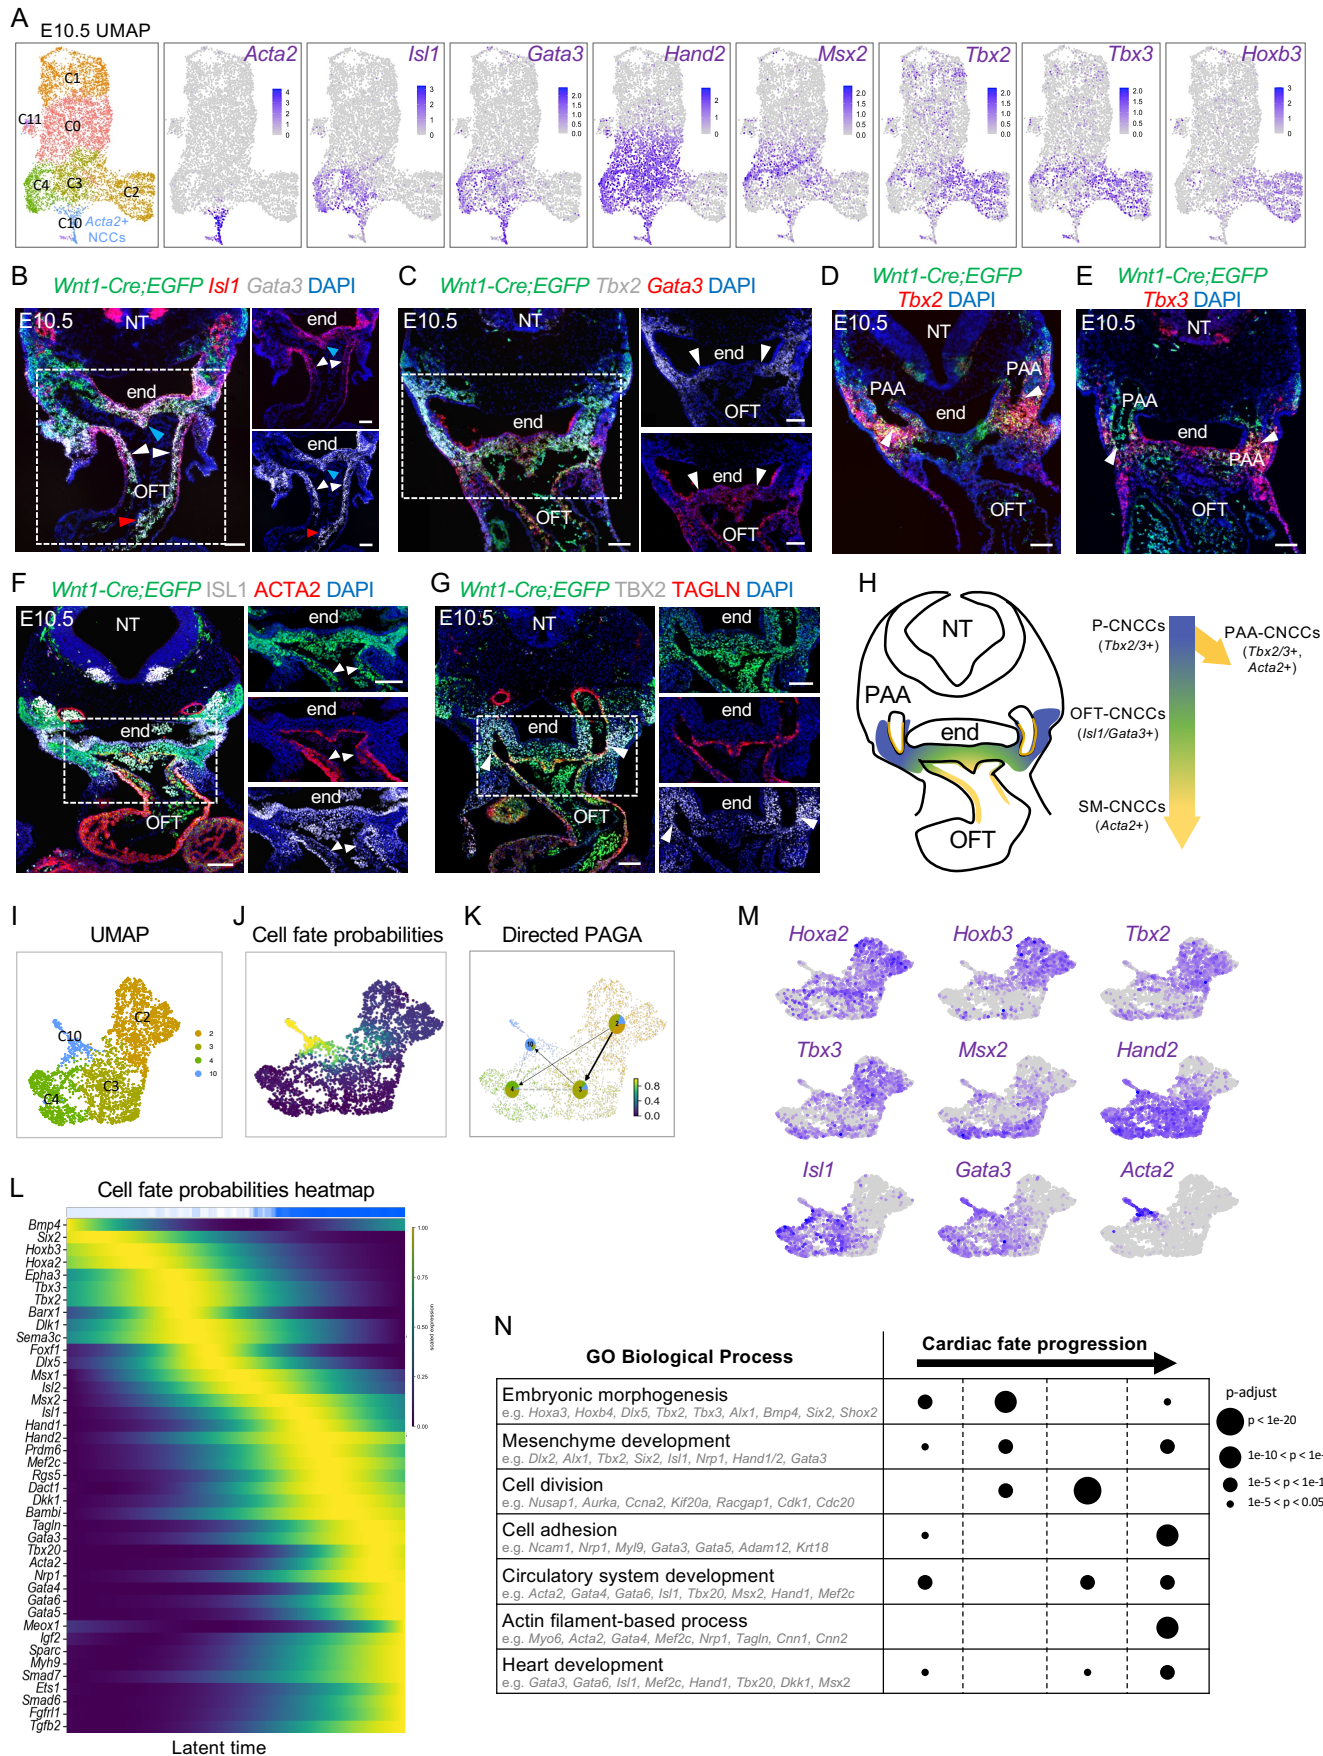



Figure 4

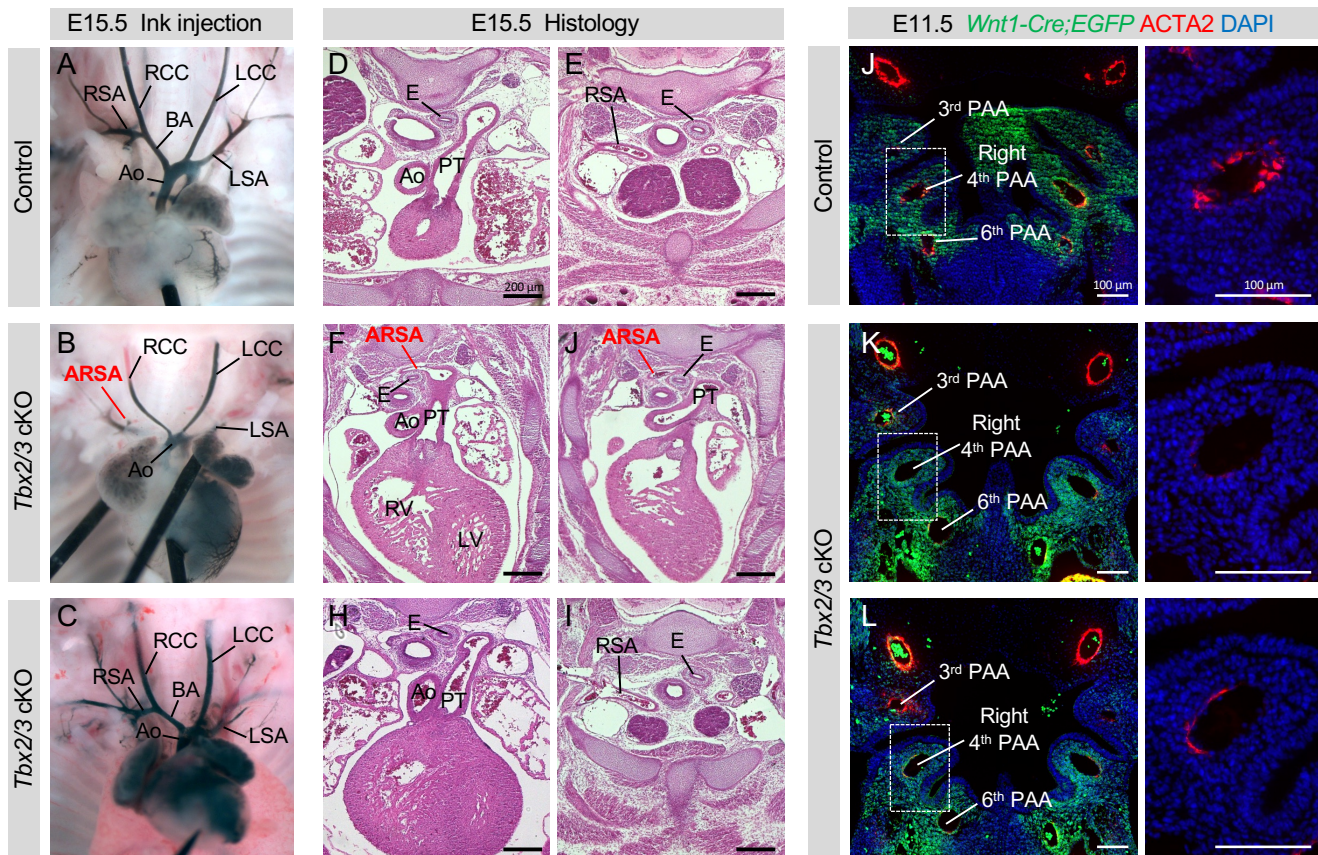

**M**

| Genotypes                                                                        | Total | Normal    | Aberrant right subclavian artery |
|----------------------------------------------------------------------------------|-------|-----------|----------------------------------|
| <i>Tbx2<sup>fl/fl</sup>;Tbx3<sup>fl/fl</sup></i>                                 |       |           |                                  |
| <i>Tbx2<sup>fl/+</sup>;Tbx3<sup>fl/fl</sup></i> (Control)                        | 6     | 6 (100%)  | 0                                |
| <i>Tbx2<sup>fl/fl</sup>;Tbx3<sup>fl/+</sup></i>                                  |       |           |                                  |
| <i>Wnt1-Cre/+;Tbx2<sup>fl/+</sup>;Tbx3<sup>fl/+</sup></i>                        | 3     | 3 (100%)  | 0                                |
| <i>Wnt1-Cre/+;Tbx2<sup>fl/fl</sup>;Tbx3<sup>fl/+</sup></i>                       | 5     | 5 (100%)  | 0                                |
| <i>Wnt1-Cre/+;Tbx2<sup>fl/+</sup>;Tbx3<sup>fl/fl</sup></i>                       | 7     | 7 (100%)  | 0                                |
| <i>Wnt1-Cre/+;Tbx2<sup>fl/fl</sup>;Tbx3<sup>fl/fl</sup></i> ( <i>Tbx2/3</i> cKO) | 13    | 8 (61.5%) | 5 (38.5%)                        |

## Figure 5

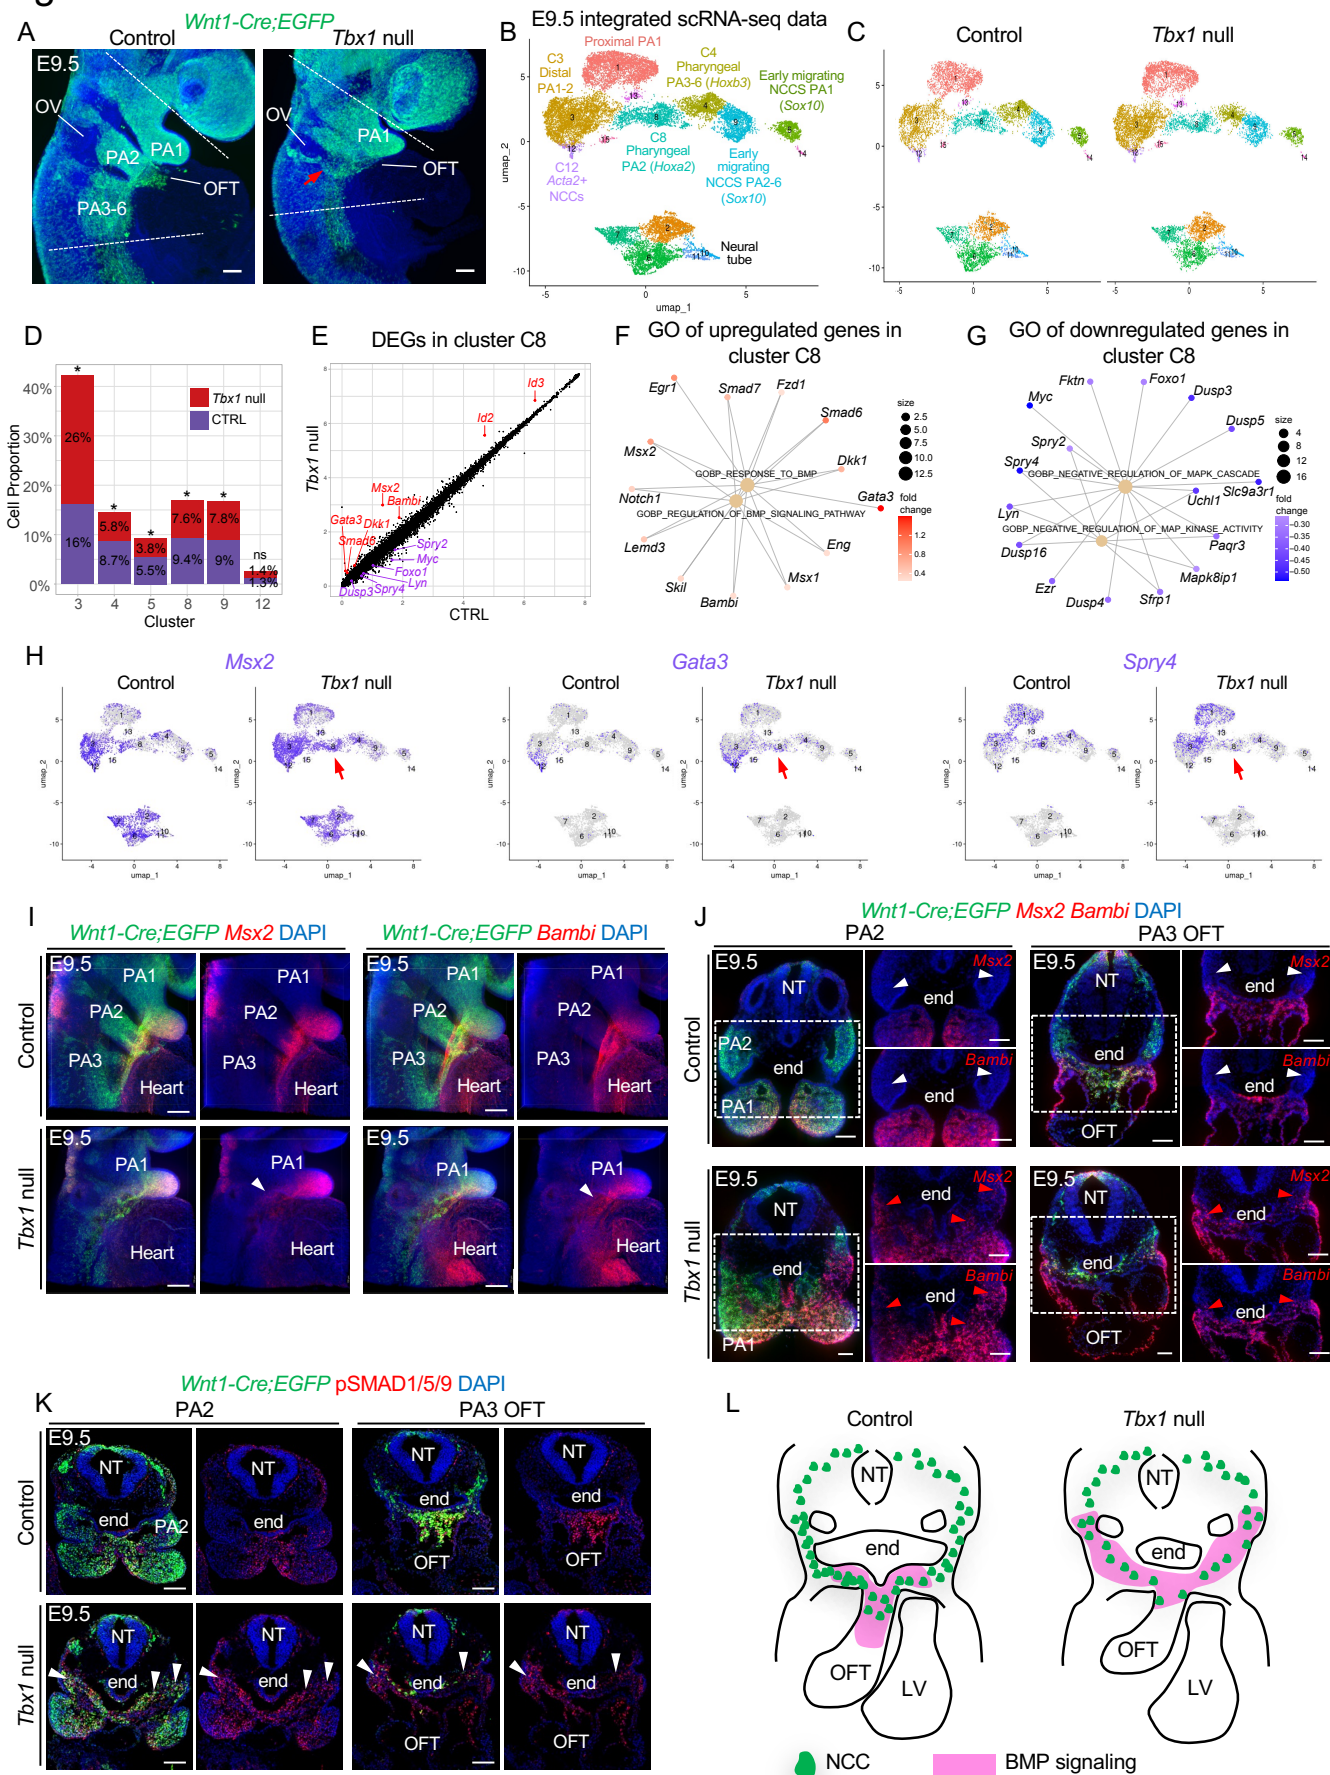



## Figure 6

A

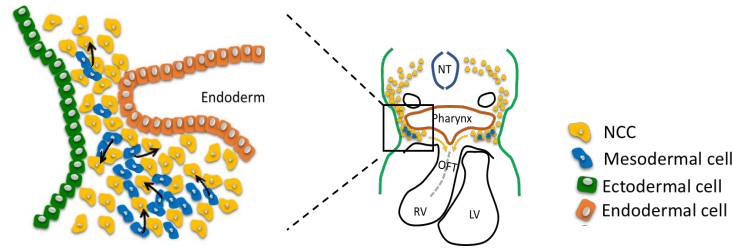

B

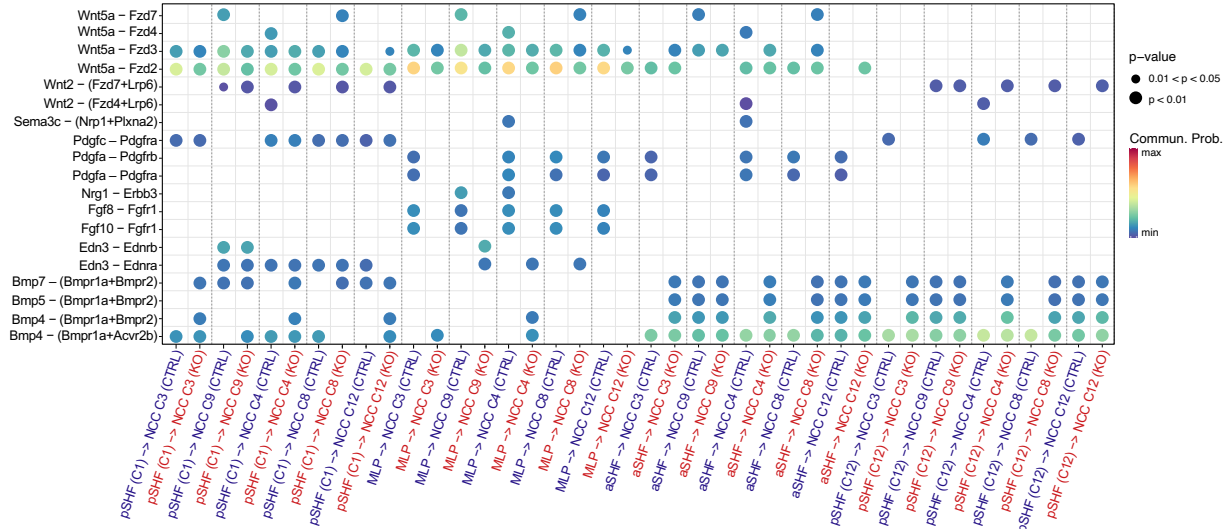

C

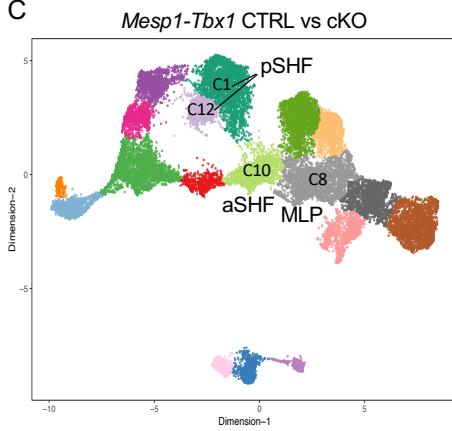

D

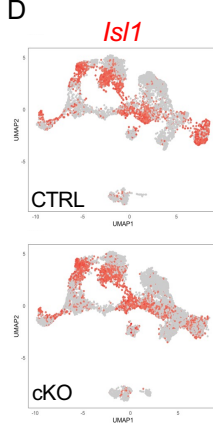

E

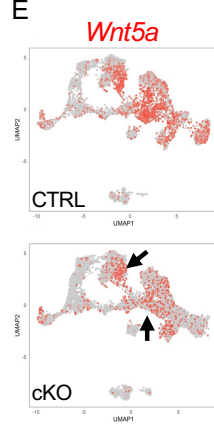

F

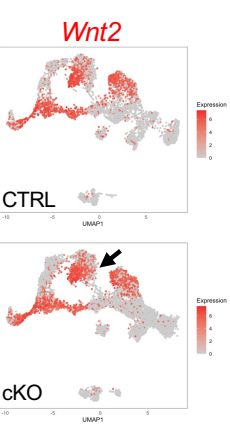

G

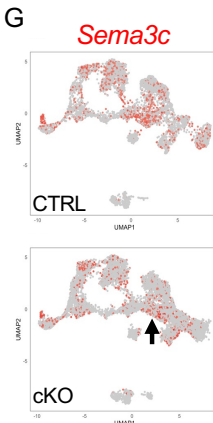

H

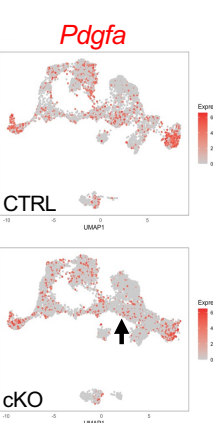

I

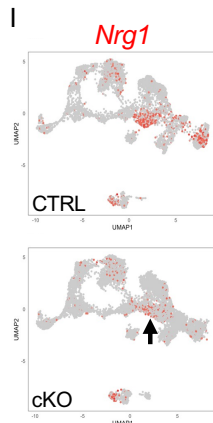

J

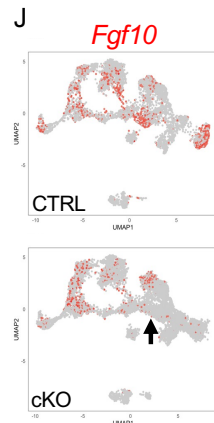

K

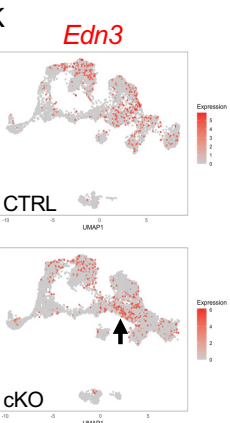

## Figure 7

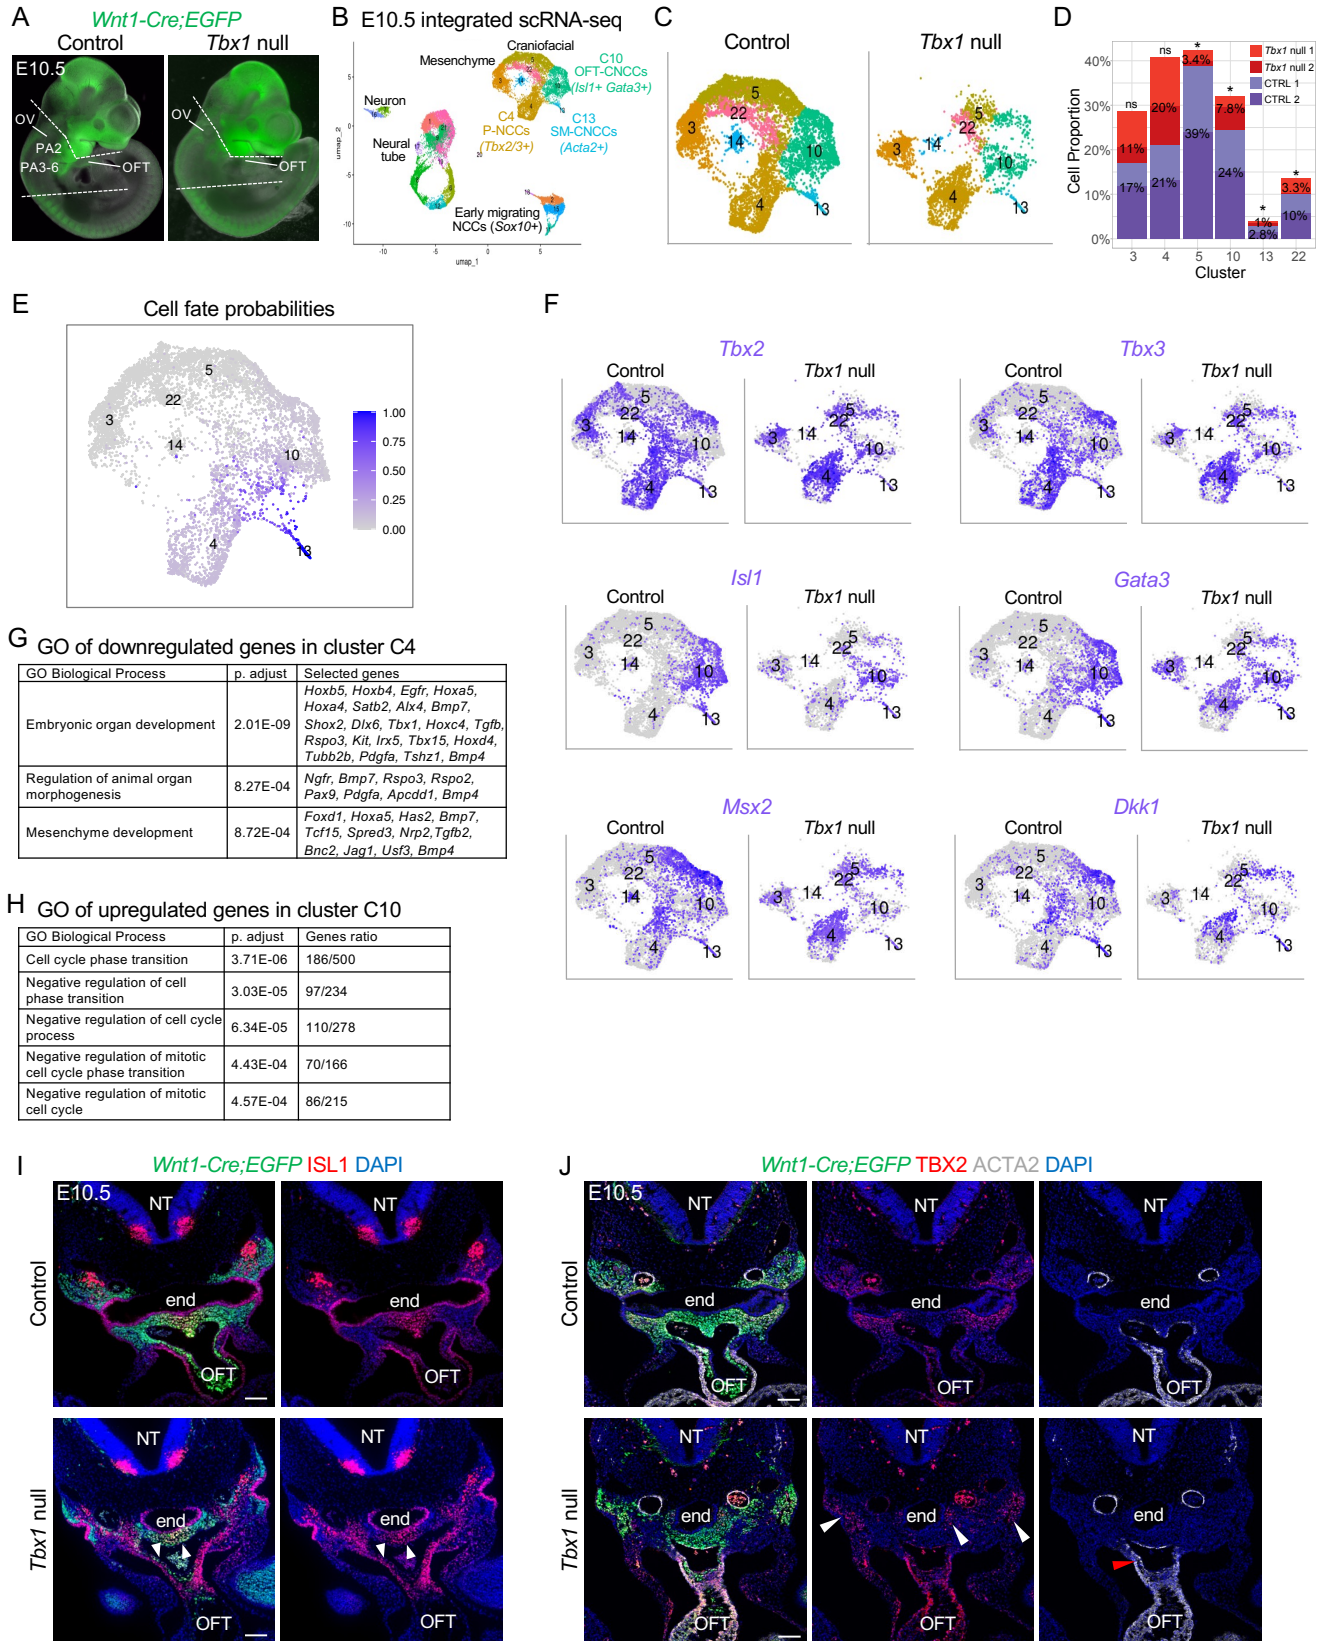

## Figure 8

### A Model of multistep specification to form the cardiac neural crest cells

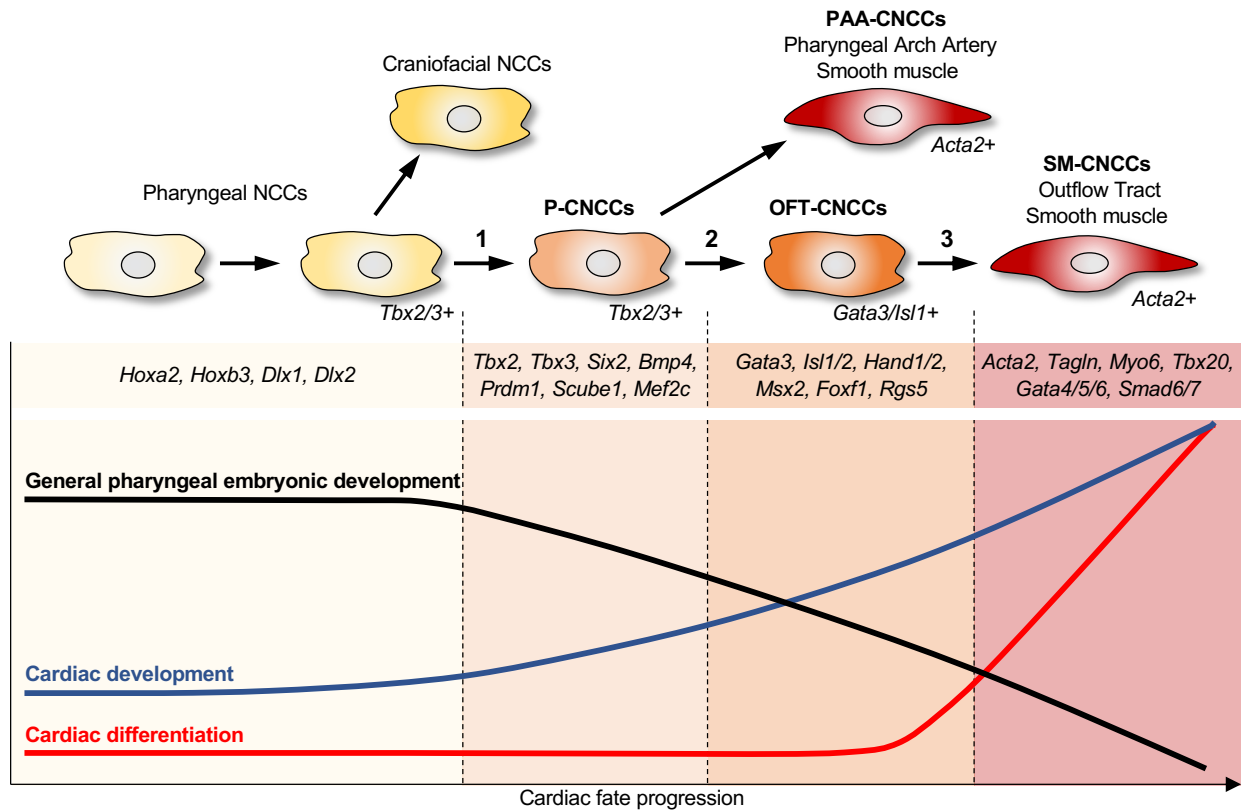

### B Model of cardiac NCCs fate progression failure due to altered signaling from the pharyngeal mesoderm in *Tbx1* null embryo

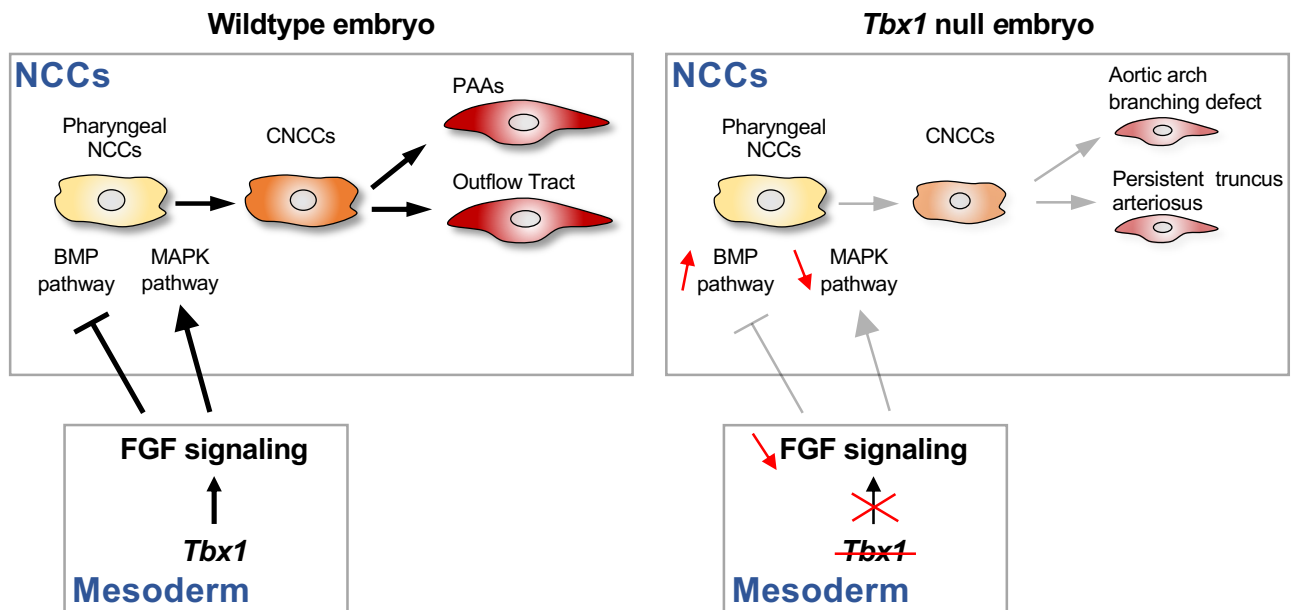

Source: http://biorxiv.org/content/10.1101/2022.08.01.502391v1.full.pdf
